# Supplementary material for: Role of the splicing factor SRSF4 in cisplatin-induced modifications of pre-mRNA splicing and apoptosis
Source: PubMed Central journal article supplement (PMC4399393; doi:10.1186/s12885-015-1259-0), 2015-04-07
Supplement: 12885_2015_1259_MOESM2_ESM.pdf [file 12885_2015_1259_MOESM2_ESM.pdf]

**Additional file 2: Sequences of the primers used for RT-qPCR and RT-PCR analyses.**

| RT-qPCR          |                                 |                                 |              |                                                |
|------------------|---------------------------------|---------------------------------|--------------|------------------------------------------------|
| Target mRNA      | Primers                         |                                 | Cycle number | Length (bp)                                    |
| FAS              | Fwd: gtaaatgcccaagtgactgacatca  |                                 | 40           | 260                                            |
|                  | Rev: tcatcacacaatctacatcttctgca |                                 |              |                                                |
| GAPDH            | Fwd: cgccccacttgatttgg          |                                 | 40           | 183                                            |
|                  | Rev: atggaaatcccatcaccatctt     |                                 |              |                                                |
| ACTB             | Fwd: gccgtgtgaacctgtgact        |                                 | 40           | 213                                            |
|                  | Rev: gcttacctgtctcgatcccactt    |                                 |              |                                                |
| B2M              | Fwd: gagtatgcctgccgtgtg         |                                 | 40           | 110                                            |
|                  | Rev: aatccaaatgccgcatct         |                                 |              |                                                |
| BRCA1            | Fwd: ccagatgcctggacagaggacaa    |                                 | 40           | 152                                            |
|                  | Rev: tggctgtggggatctgggta       |                                 |              |                                                |
| RB1              | Fwd: tgaaggatcagatgaagcagatgga  |                                 | 40           | 179                                            |
|                  | Rev: cacagtgtcccaaggctcctga     |                                 |              |                                                |
| MYB              | Fwd: tagaaccacagctatcaaaagtca   |                                 | 40           | 168                                            |
|                  | Rev: gattcctgttgatcacatcctgca   |                                 |              |                                                |
| SERPINB5         | Fwd: tggagccacgttctgtatggga     |                                 | 40           | 196                                            |
|                  | Rev: gccatggtgctgggattagcca     |                                 |              |                                                |
| JAK2             | Fwd: ttaccaagaccagatggatgccca   |                                 | 40           | 152                                            |
|                  | Rev: gaaggtcattcttcatccagcca    |                                 |              |                                                |
| End-point RT-PCR |                                 |                                 |              |                                                |
| Target mRNA      | Target exon                     | Primers                         | Cycle number | Length (bp)                                    |
| VEGF             | 5-8                             | fwd: cctggtggacatctccaggagta    | 35           | 111/121/145/165                                |
|                  |                                 | rev: ctaccgcctcggctgtcaca       |              |                                                |
| MDM-2            | E4-11                           | fwd: acctcacagattccagcttcggaa   | 34           | FL:1161pb/ alt1:±350pb                         |
|                  |                                 | rev: gctactagaagttgatggctgagaa  |              |                                                |
| MTA1             | E3-4                            | fwd: gatccggagaatcaggagctca     | 27           | FL:295pb/ ΔE4:244pb/<br>ΔE3:203pb/ ΔE3-4:152pb |
|                  |                                 | Rev: aggaacagctcccgatgccga      |              |                                                |
| SRSF3            | E4                              | fwd: gattatcgtaggaggagtctcca    | 31           | FL:650pb/ ΔE4:179pb                            |
|                  |                                 | rev: catttgacctagatcgactacgaga  |              |                                                |
| CSDE1            | E4                              | fwd: agcccgaactctcgcgagaga      | 35           | FL: 1086pb /ΔE2-4:501pb/<br>ΔE2-3-4-5:244pb    |
|                  |                                 | rev: ccagctgaacgttccctcgaca     |              |                                                |
| EIF4A2           | E4                              | fwd: atcgagagcaactggaatgagattg  | 31           | FL: 354pb/ ΔE4: 207pb                          |
|                  |                                 | rev: aacattgttcccaatgcaggca     |              |                                                |
| TMPO             | E6-E7-E8                        | fwd: cactcaagcaaagaagattgagca   | 35           | FL: 501pb/ ΔE6: 386pb/ΔE6-7-<br>8:174pb        |
|                  |                                 | rev: tgagttctaaggccgcctgca      |              |                                                |
| HNRPDL           | E6                              | fwd: agatacatcaaaattggttctgggaa | 31           | FL: 341pb/ΔE6: 170pb                           |
|                  |                                 | rev: gatgccttgccataagtgtctgt    |              |                                                |
| HNRPDL           | E8                              | fwd: tcaccaaaacaattaccagccatact | 31           | FL: 338pb/ΔE8:233pb                            |
|                  |                                 | rev: tgagacataaacacagatagcaagga |              |                                                |
| AMZ2             | E3                              | fwd: gccagtgatctcttggaccatt     | 30           | FL:452pb/ ΔE3:278pb                            |
|                  |                                 | rev: gtcaaagaggcctgtccaaagaca   |              |                                                |
| MAGOH            | E3-4                            | fwd: aagtcggccacgagtcttgga      | 27           | FL:353pb/ΔE3:242pb                             |
|                  |                                 | rev: accaaacactcaggtcctggaca    |              |                                                |
| NFE2L1           | E5                              | fwd: gcaggacacctggcaggcca       | 27           | FL:274pb/ΔE5:184pb                             |

|       |      |                                 |    |                    |
|-------|------|---------------------------------|----|--------------------|
|       |      | rev: cccggtcagaagaggagacaaga    |    |                    |
| STRAP | E2   | fwd: agcccgaggcactgcagcagaa     | 27 | FL:367pb/ΔE2:232pb |
|       |      | rev: catcaattcatctcctgagacagca  |    |                    |
| SRSF4 | None | fwd: cattctaagagtagatctcggctcca | 28 | 122pb              |
|       |      | rev: ctcttttccttgctgggctcct     |    |                    |
| SRSF6 | None | fwd: gcgagcgcgtgatcgtagagca     | 25 | 144pb              |
|       |      | rev: attctgtacgaacaggtggctcct   |    |                    |

The number of PCR cycles, the sequence of the primers and the size of the RT-qPCR and RT-PCR products are indicated. The exons targeted by RT-PCR are also mentioned. For RT-qPCR, the PCR conditions for amplification were 15sec. at 95°C and 1min. at 66°C except for ACTN (15sec. at 95°C; 1min. at 60°C). General information of RT-qPCR analysis are described in additional file 1. For End-point RT-PCR, 10ng of total RNA were reverse transcribed and amplified using GeneAmp ThermoStable rTth Reverse Transcriptase RNA PCR kit (Perkin-Helmer, Boston, MA, USA) and specific pairs of primers (Eurogentec, Seraing, Belgium) in an automated thermal cycler (GeneAmp PCR System 2400 or 9600, Perkin-Elmer, Norwalk, CT, USA). The RT step was at 70°C for 15 minutes. Denaturation of RNA/DNA heteroduplexes for 2 minutes incubation at 95°C was followed by PCR amplification for adequate number of cycles (25 to 35) and a final elongation step of 2 minutes at 72°C. The PCR conditions for amplification of the various genes were 15s of denaturation at 94°C; 20s of primer annealing at 66°C and 30s of polymerization at 72°C, except for MDM-2, CSDE1 E4, TMPO and AMZ2 (15s at 95°C; 20s at 60°C and 60s at 72°C), VEGF-A ( 20s at 95°C; 30s at 60°C and 60s at 72°C), SRSF4, SRSF6 (15s at 95°C; 20s at 60°C and 10s at 72°C).
