# Supplementary material for: Role of the splicing factor SRSF4 in cisplatin-induced modifications of pre-mRNA splicing and apoptosis
Source: PubMed Central journal article supplement (PMC4399393; doi:10.1186/s12885-015-1259-0), 2015-04-07
Supplement: 12885_2015_1259_MOESM3_ESM.pdf [file 12885_2015_1259_MOESM3_ESM.pdf]

**Additional file 3. Differential gene expression of controls and cisplatin-treated MCF7 cells.**

| Gene      | Locus                     | Fold_change | p_value    | q_value    |
|-----------|---------------------------|-------------|------------|------------|
| -         | chr3:152888857-152897509  | 252.35      | 2.9E-10    | 5.1587E-07 |
| SERPINB5  | chr18:61144143-61172318   | 125.81      | 2.1994E-12 | 1.5428E-08 |
| POU3F1    | chr1:38509522-38512450    | 104.95      | 7.6897E-05 | 0.00615107 |
| NKX1-2    | chr10:126133844-126138586 | 75.41       | 0.00092482 | 0.0362893  |
| -         | chr13:27840423-27842744   | 67.52       | 0.00038061 | 0.0198025  |
| LAMP3     | chr3:182840002-182880667  | 62.74       | 0.00046666 | 0.0228474  |
| -         | chr3:152897652-152902938  | 52.16       | 4.6066E-08 | 3.2469E-05 |
| ATF3      | chr1:212738675-212794119  | 51.28       | 1.4716E-10 | 3.5796E-07 |
| GADD45A   | chr1:68150859-68154021    | 51.26       | 3.6262E-11 | 1.5051E-07 |
| HBEGF     | chr5:139712427-139726188  | 44.24       | 8.2292E-09 | 8.3083E-06 |
| HES2      | chr1:6472670-6479979      | 41.20       | 5.3796E-08 | 3.5886E-05 |
| NGFR      | chr17:47572654-47592382   | 40.97       | 2.12E-06   | 0.00047996 |
| -         | chr1:201427965-201431714  | 39.30       | 1.236E-05  | 0.00169751 |
| -         | chr10:124944061-124949886 | 38.20       | 1.4672E-05 | 0.00190571 |
| -         | chr11:65201932-65203797   | 33.61       | 1.0548E-09 | 1.4593E-06 |
| SNAI1     | chr20:48599512-48605420   | 32.12       | 1.3471E-05 | 0.00181665 |
| GPR3      | chr1:27719151-27722317    | 31.57       | 4.3308E-05 | 0.00417043 |
| GPR172B   | chr17:4935896-4938727     | 28.94       | 1.9755E-05 | 0.00237589 |
| -         | chr3:63737820-63741641    | 28.53       | 6.7971E-05 | 0.00562926 |
| -         | chr2:91759769-91764245    | 28.45       | 2.8348E-05 | 0.00314237 |
| FLJ26850  | chr19:50553936-50570052   | 28.01       | 0.00031041 | 0.0173847  |
| PTAFR     | chr1:28473676-28520447    | 27.93       | 8.0828E-07 | 0.00024475 |
| PRODH     | chr22:18900286-18924066   | 26.66       | 0.00065482 | 0.0291553  |
| C5orf4    | chr5:154198051-154230213  | 26.66       | 1.6797E-05 | 0.00206864 |
| -         | chr4:90604622-90609524    | 22.44       | 5.4234E-05 | 0.00489563 |
| PMAIP1    | chr18:57567191-57571538   | 22.18       | 8.5177E-10 | 1.2637E-06 |
| HAP1      | chr17:39872703-39890898   | 20.69       | 0.00071749 | 0.0308075  |
| FAS       | chr10:90694830-90775542   | 20.59       | 8.2902E-08 | 4.9157E-05 |
| GUCA1B    | chr6:42151021-42162694    | 20.36       | 5.0831E-05 | 0.00471181 |
| -         | chr9:66464189-66465422    | 19.71       | 0.00136013 | 0.0473964  |
| LIF       | chr22:30636441-30642796   | 19.22       | 9.2333E-08 | 5.3065E-05 |
| TNFRSF10C | chr8:22941867-22979518    | 19.07       | 0.00027382 | 0.0159326  |
| PDE3A     | chr12:20522178-20837041   | 17.72       | 7.0721E-13 | 6.6047E-09 |
| MIR612    | chr11:65211298-65212733   | 17.42       | 6.0399E-05 | 0.00521075 |
| KANK3     | chr19:8387467-8408146     | 17.12       | 0.0004378  | 0.0219228  |
| DDN       | chr12:49388932-49393088   | 16.88       | 0.00117524 | 0.0427898  |
| PDE4C     | chr19:18318770-18359010   | 15.19       | 0.00030944 | 0.0173847  |
| BTG2      | chr1:203274663-203278729  | 15.06       | 1.568E-10  | 3.5796E-07 |
| CDKN1A    | chr6:36644236-36680969    | 15.06       | 5.2856E-10 | 8.9749E-07 |
| -         | chr9:139011220-139016125  | 14.86       | 0.00022824 | 0.0139877  |
| GLIPR2    | chr9:36136741-36163903    | 14.81       | 0.00071923 | 0.0308469  |
| FDXR      | chr17:72858618-72869156   | 14.61       | 5.737E-08  | 3.695E-05  |
| -         | chr13:20530047-20532560   | 14.54       | 0.00017712 | 0.0116901  |
| ARC       | chr8:143692409-143695833  | 14.44       | 1.484E-05  | 0.00191815 |
| ZNF488    | chr10:48355088-48373866   | 14.39       | 0.00022657 | 0.0139208  |
| -         | chr9:96197758-96201089    | 14.22       | 0.00111627 | 0.0414094  |
| -         | chr11:65203864-65205748   | 14.13       | 4.3278E-06 | 0.00078863 |
| -         | chr17:46202261-46205916   | 13.96       | 0.00050333 | 0.0239215  |
| CSF1      | chr1:110453232-110473616  | 13.93       | 0.0006025  | 0.0273473  |
| RN5-8S1   | chr22:155996-156152       | 13.54       | 1.5751E-06 | 0.00039866 |
| PLK3      | chr1:45266035-45272957    | 12.20       | 6.4627E-05 | 0.00543975 |
| SERTAD1   | chr19:40928408-40931932   | 12.11       | 8.9516E-07 | 0.00025922 |
| GDF15     | chr19:18496967-18499986   | 11.81       | 8.7956E-10 | 1.2637E-06 |
| -         | chr14:77561767-77564132   | 11.66       | 0.00131723 | 0.046429   |
| GGT6      | chr17:4459536-4463876     | 11.34       | 0.00081615 | 0.0332839  |
| TAP1      | chr6:32808493-32846950    | 11.27       | 1.1158E-05 | 0.00158489 |
| BBC3      | chr19:47724078-47736023   | 10.96       | 0.00022841 | 0.0139877  |
| SLC35E4   | chr22:31031792-31043862   | 10.77       | 0.00079094 | 0.0326839  |
| EFNB1     | chrX:68048839-68062006    | 10.72       | 2.4259E-06 | 0.00053307 |
| ISG15     | chr1:948846-949919        | 10.66       | 2.5459E-05 | 0.00288198 |
| SESN1     | chr6:109307639-109415708  | 10.61       | 0.00001186 | 0.0016409  |
| MAFB      | chr20:39314516-39317876   | 10.50       | 3.3502E-05 | 0.00362399 |
| RGAG4     | chrX:71130937-71363424    | 10.46       | 7.9532E-06 | 0.00121763 |

|               |                           |       |            |            |
|---------------|---------------------------|-------|------------|------------|
| SP6           | chr17:45922152-45933240   | 10.41 | 0.00109528 | 0.0408337  |
| ABHD4         | chr14:23067146-23081853   | 10.16 | 8.6313E-07 | 0.0002519  |
| -             | chr7:76744574-76750792    | 10.15 | 0.00017145 | 0.0114165  |
| SERPINE1      | chr7:100770378-100782547  | 10.13 | 0.00020411 | 0.0130338  |
| -             | chr11:65210261-65211224   | 10.05 | 0.00067456 | 0.0296805  |
| PROCR         | chr20:33759773-33765165   | 9.99  | 7.8173E-05 | 0.00622649 |
| SFN           | chr1:27189566-27216869    | 9.72  | 5.866E-06  | 0.00097761 |
| PRICKLE2      | chr3:64053639-64211131    | 9.47  | 0.00035994 | 0.0191397  |
| TP53INP1      | chr8:95918344-95961615    | 9.34  | 2.1124E-07 | 9.6231E-05 |
| -             | chr9:66454654-66457900    | 9.31  | 2.0466E-05 | 0.0024271  |
| EDA2R         | chrX:65581617-65859140    | 9.10  | 0.00134047 | 0.0470927  |
| SLC6A8        | chrX:152953751-152962048  | 8.93  | 0.00011945 | 0.00873188 |
| LCAT,SLC12A4  | chr16:67973786-68002597   | 8.92  | 0.00059409 | 0.0271307  |
| FOS           | chr14:75745480-75748937   | 8.36  | 4.426E-05  | 0.00422669 |
| HIC2          | chr22:21771692-21805750   | 8.27  | 0.00076054 | 0.0319221  |
| NRG4          | chr15:76228349-76304785   | 8.09  | 4.4525E-06 | 0.00079965 |
| DUSP5         | chr10:112257624-112271302 | 7.80  | 0.00057507 | 0.026391   |
| RETSAT        | chr2:85569077-85581821    | 7.64  | 5.353E-05  | 0.00486538 |
| LACC1         | chr13:44410488-44468070   | 7.54  | 0.00019253 | 0.0124915  |
| SESN2         | chr1:28585962-28609002    | 7.51  | 5.6104E-06 | 0.00094833 |
| PDE4A         | chr19:10527448-10580307   | 7.51  | 0.00135248 | 0.047218   |
| RNF19B        | chr1:33402049-33430396    | 7.47  | 0.00031717 | 0.0176837  |
| PLXNB3        | chrX:153029635-153044801  | 7.24  | 0.00025807 | 0.0152778  |
| TSPYL2        | chrX:53111541-53117728    | 7.23  | 4.9245E-05 | 0.00461764 |
| SAT1          | chrX:23801274-23804327    | 7.09  | 0.00016551 | 0.0110603  |
| TUBB2A,TUBB2B | chr6:3153901-3227968      | 6.50  | 0.00019133 | 0.0124736  |
| C1orf63       | chr1:25568739-25573985    | 6.29  | 0.00072222 | 0.0308689  |
| PPP1R15A      | chr19:49375648-49379319   | 6.29  | 6.6693E-05 | 0.00553642 |
| IER5          | chr1:181057637-181062546  | 6.21  | 5.9301E-05 | 0.00513981 |
| MAFG          | chr17:79876144-79885587   | 6.13  | 0.000325   | 0.0179927  |
| TP53INP2      | chr20:33292147-33301240   | 5.90  | 0.00055671 | 0.025834   |
| ALDH1A3       | chr15:101420008-101456860 | 5.43  | 0.00026328 | 0.0155126  |
| PRIC285       | chr20:62189438-62205592   | 5.33  | 0.00023029 | 0.0140579  |
| ID2           | chr2:8819399-8824656      | 5.31  | 0.00089853 | 0.0354814  |
| TRIAP1        | chr12:120881763-120884215 | 5.17  | 3.9512E-05 | 0.00397993 |
| RPS17         | chr15:82821160-82824865   | 5.14  | 4.172E-05  | 0.00410126 |
| GPR84,ZNF385A | chr12:54756228-54785107   | 5.10  | 0.00014746 | 0.010197   |
| IRF1          | chr5:131817300-131826465  | 4.88  | 0.00105245 | 0.0398735  |
| EPHA2         | chr1:16450831-16482582    | 4.84  | 0.00021545 | 0.0134137  |
| ISCU          | chr12:108956293-108963160 | 4.76  | 0.00020814 | 0.0131538  |
| C12orf5       | chr12:4430358-4469190     | 4.74  | 0.00019483 | 0.0126135  |
| HOXC13        | chr12:54332575-54340328   | 4.68  | 0.00047788 | 0.0230965  |
| SLC30A1       | chr1:211744873-211752525  | 4.54  | 0.00105106 | 0.0398611  |
| JUN           | chr1:59246462-59249785    | 4.47  | 0.00063267 | 0.0283509  |
| PRKAB1        | chr12:120105760-120119429 | 4.42  | 0.00029523 | 0.0168635  |
| IRGQ          | chr19:44088518-44100287   | 4.16  | 0.00041998 | 0.0211437  |
| HEXIM1        | chr17:43224683-43229468   | 4.06  | 0.00047402 | 0.0230225  |
| RAP2B         | chr3:152878530-152888759  | 3.87  | 0.00139061 | 0.0479222  |
| USP32         | chr17:58253735-58469586   | 3.66  | 0.00098603 | 0.0378386  |
| CBX5          | chr12:54624730-54673915   | 3.82  | 0.00031027 | 0.0173847  |
| MTHFD1        | chr14:64854758-64926725   | 3.84  | 0.00041888 | 0.0211168  |
| NUCKS1        | chr1:205681946-205719382  | 3.86  | 0.00056112 | 0.0259741  |
| PACS1         | chr11:65837823-66015985   | 3.87  | 0.00066563 | 0.0294736  |
| NPNT          | chr4:106816596-106892828  | 3.94  | 0.00136203 | 0.0474185  |
| UGDH          | chr4:39500374-39529218    | 3.94  | 0.00054927 | 0.0256482  |
| KCTD3         | chr1:215740734-215795149  | 3.99  | 0.00061498 | 0.0277788  |
| KPNA3         | chr13:50273442-50367057   | 4.03  | 0.00072505 | 0.0309543  |
| SLC7A2        | chr8:17354596-17428087    | 4.03  | 0.00030193 | 0.0171152  |
| CLIC4         | chr1:25071759-25170815    | 4.05  | 0.00082342 | 0.0334344  |
| SORT1         | chr1:109852187-109940563  | 4.07  | 0.00086495 | 0.0345941  |
| KIAA1244      | chr6:138483052-138665800  | 4.08  | 0.00024943 | 0.014957   |
| BIRC6         | chr2:32582095-32843965    | 4.09  | 0.00105686 | 0.0399858  |
| IGF1R         | chr15:99192122-99638420   | 4.09  | 0.00071445 | 0.0307476  |
| TACC1         | chr8:38585703-38710546    | 4.11  | 0.00106737 | 0.0402755  |
| TMEM48        | chr1:54231133-54304225    | 4.19  | 0.00146189 | 0.0491986  |
| SLC7A1        | chr13:30083550-30169825   | 4.20  | 0.00043847 | 0.0219272  |
| EMP2          | chr16:10622278-10674539   | 4.20  | 0.00018075 | 0.0119085  |
| MAP4          | chr3:47892179-48130769    | 4.21  | 0.00069822 | 0.0302582  |

|           |                           |      |            |            |
|-----------|---------------------------|------|------------|------------|
| RB1       | chr13:48877882-49056026   | 4.22 | 0.00087959 | 0.0349925  |
| MCM6      | chr2:136597195-136634018  | 4.23 | 0.00087338 | 0.0348196  |
| APP       | chr21:27252860-27543446   | 4.25 | 0.00087138 | 0.0347913  |
| TPD52     | chr8:80947104-81083836    | 4.25 | 0.00052038 | 0.0245445  |
| ABHD2     | chr15:89631380-89745591   | 4.30 | 0.00048959 | 0.0234777  |
| BMPR2     | chr2:203241049-203432474  | 4.31 | 0.00085931 | 0.0344423  |
| RNF130    | chr5:179382473-179499109  | 4.32 | 0.00140822 | 0.0481974  |
| CDC6      | chr17:38444145-38459413   | 4.34 | 0.00110711 | 0.0411516  |
| ARHGAP35  | chr19:47364302-47508334   | 4.40 | 0.00026373 | 0.0155149  |
| HPS3      | chr3:148847370-148939832  | 4.42 | 0.00090553 | 0.0356826  |
| DEK       | chr6:18224399-18264799    | 4.49 | 0.00014021 | 0.00988931 |
| XBP1      | chr22:29190547-29196560   | 4.50 | 5.31E-05   | 0.00484984 |
| CLSPN     | chr1:36197712-36235551    | 4.50 | 0.0014804  | 0.0496426  |
| UCK2      | chr1:165796731-165880855  | 4.52 | 0.00142071 | 0.0482849  |
| TPD52L1   | chr6:125474878-125584644  | 4.55 | 0.00092706 | 0.0363011  |
| DAAM1     | chr14:59655387-59838119   | 4.56 | 0.00141947 | 0.0482849  |
| DNMT1     | chr19:10244021-10305755   | 4.58 | 0.00068233 | 0.0298819  |
| SKIV2L2   | chr5:54603575-54830873    | 4.60 | 0.00141528 | 0.0482824  |
| BLM       | chr15:91260578-91359205   | 4.60 | 0.00148685 | 0.0498142  |
| ZFP36L2   | chr2:43449540-43453745    | 4.61 | 9.3023E-05 | 0.00713547 |
| DMXL2     | chr15:51739920-51915013   | 4.62 | 0.00052691 | 0.0247278  |
| ERGIC1    | chr5:172261222-172379688  | 4.63 | 0.0001107  | 0.00825974 |
| KITLG     | chr12:88886569-88974250   | 4.66 | 0.00043478 | 0.0218008  |
| PDE8A     | chr15:85523743-85682402   | 4.68 | 0.00089483 | 0.0354104  |
| ZNRF1     | chr16:75032914-75144892   | 4.69 | 0.00049103 | 0.0235165  |
| ZFH3      | chr16:72698797-73092534   | 4.69 | 0.00134552 | 0.0470927  |
| SKAP2     | chr7:26706687-26904341    | 4.70 | 0.00083745 | 0.0337838  |
| MYO1B     | chr2:192110027-192290115  | 4.73 | 0.00033166 | 0.0182466  |
| FANCD2    | chr3:10068076-10149915    | 4.74 | 0.00132904 | 0.0467931  |
| SEPT9     | chr17:75277491-75561103   | 4.74 | 0.00029114 | 0.0167062  |
| DNAJC1    | chr10:22045476-22292650   | 4.77 | 0.00107909 | 0.0405946  |
| LRRF1     | chr6:53659777-53788919    | 4.84 | 0.00058339 | 0.0267074  |
| ATP11C    | chrX:138808504-139014338  | 4.90 | 0.00036019 | 0.0191397  |
| ZHX3      | chr20:39807088-39928739   | 4.94 | 0.00137649 | 0.0476578  |
| SMC2      | chr9:106856540-106905332  | 5.01 | 0.00083053 | 0.0336135  |
| BRIP1     | chr17:59756546-59940920   | 5.01 | 0.00091891 | 0.0361334  |
| MBNL1     | chr3:151980404-152365946  | 5.04 | 0.00061662 | 0.0277859  |
| TBC1D30   | chr12:65174208-65274798   | 5.06 | 0.00097588 | 0.03763    |
| IGSF3     | chr1:117116973-117210314  | 5.10 | 0.00015361 | 0.0104712  |
| RDX       | chr11:110100165-110167437 | 5.12 | 0.0001539  | 0.0104717  |
| SGOL2     | chr2:201390864-201448818  | 5.19 | 0.00115944 | 0.0424566  |
| DOPEY2    | chr21:37529123-37666583   | 5.20 | 0.00019235 | 0.0124915  |
| DSCAM-AS1 | chr21:41384096-42219039   | 5.22 | 0.00073525 | 0.0312082  |
| EFEMP1    | chr2:56093096-56151298    | 5.22 | 0.00128842 | 0.0456645  |
| TOP2A     | chr17:38544772-38574202   | 5.23 | 1.5203E-05 | 0.00192511 |
| EEA1      | chr12:93166284-93323107   | 5.23 | 0.00101103 | 0.0386176  |
| SMCHD1    | chr18:2655885-2805015     | 5.25 | 0.00018412 | 0.0120875  |
| SH3D19    | chr4:152041432-152246488  | 5.26 | 0.00119317 | 0.0431338  |
| UTP20     | chr12:101673904-101780397 | 5.27 | 0.0007746  | 0.0322586  |
| SCIN      | chr7:12610202-12693531    | 5.29 | 0.00096209 | 0.0373207  |
| SMARCC1   | chr3:47627123-47823405    | 5.35 | 0.00011832 | 0.00866691 |
| SPTBN1    | chr2:54683453-54898583    | 5.36 | 0.00028726 | 0.0165342  |
| MAN2A1    | chr5:109025155-109205322  | 5.47 | 0.00060208 | 0.0273473  |
| GMPS      | chr3:155588324-155659067  | 5.48 | 0.00016288 | 0.010904   |
| ACACA     | chr17:35441919-35766902   | 5.51 | 0.00069704 | 0.0302423  |
| SLC38A1   | chr12:46576840-46663208   | 5.52 | 1.5091E-05 | 0.00192121 |
| SND1      | chr7:127292201-127847924  | 5.53 | 2.3042E-05 | 0.00262423 |
| C8orf83   | chr8:93895757-93978372    | 5.54 | 0.00129211 | 0.0457158  |
| USP37     | chr2:219314973-219433084  | 5.57 | 0.00135436 | 0.0472396  |
| ITGB6     | chr2:160956218-161056823  | 5.58 | 0.00079547 | 0.0327914  |
| MCM3      | chr6:52128811-52149582    | 5.59 | 0.00092641 | 0.0363011  |
| CFDP1     | chr16:75327607-75467387   | 5.59 | 0.0002033  | 0.0130042  |
| CHD6      | chr20:40030753-40247133   | 5.60 | 0.00020828 | 0.0131538  |
| EPS8      | chr12:15773005-15942510   | 5.66 | 0.00039585 | 0.0203797  |
| DLGAP5    | chr14:55613507-55658396   | 5.68 | 0.00047987 | 0.0231602  |
| ZNF609    | chr15:64752978-64978266   | 5.68 | 0.00086329 | 0.0345651  |
| CBFA2T3   | chr16:88941262-89043504   | 5.73 | 0.00073455 | 0.0312082  |
| RAD18     | chr3:8918879-9005159      | 5.74 | 0.00020846 | 0.0131538  |

|          |                           |      |            |            |
|----------|---------------------------|------|------------|------------|
| MYO5B    | chr18:47349155-47721451   | 5.74 | 0.00097295 | 0.0375859  |
| NUP210   | chr3:13357736-13461809    | 5.80 | 7.3176E-06 | 0.00114856 |
| CDK5RAP2 | chr9:123151146-123342437  | 5.84 | 0.0014257  | 0.0482849  |
| RAB27B   | chr18:52495707-52562747   | 5.88 | 5.3679E-05 | 0.00486706 |
| AREG     | chr4:75310852-75320726    | 5.89 | 0.00012419 | 0.00900814 |
| DOCK7    | chr1:62920396-63153974    | 5.90 | 0.00094018 | 0.0367207  |
| MTUS1    | chr8:17501302-17658727    | 5.96 | 0.00059572 | 0.027172   |
| NR2F2    | chr15:96869156-96883492   | 5.96 | 0.00011229 | 0.0083393  |
| EMB      | chr5:49691963-49737234    | 5.97 | 0.00014061 | 0.00988931 |
| KIAA1549 | chr7:138516126-138666064  | 6.01 | 0.00039912 | 0.020424   |
| MIS18BP1 | chr14:45672392-45722605   | 6.01 | 0.00019261 | 0.0124915  |
| FAM111B  | chr11:58874657-58910221   | 6.03 | 0.00074858 | 0.0315326  |
| ATP2B1   | chr12:89981825-90105729   | 6.05 | 5.5855E-05 | 0.00495609 |
| ATP9A    | chr20:50213313-50384908   | 6.08 | 6.4239E-06 | 0.00102992 |
| NASP     | chr1:46049370-46084578    | 6.09 | 0.00037917 | 0.0197548  |
| MPHOSPH9 | chr12:123634560-123717676 | 6.14 | 0.0009722  | 0.0375859  |
| BUB1     | chr2:111394804-111435684  | 6.14 | 0.00012538 | 0.00907679 |
| RBFOX2   | chr22:36134782-36424585   | 6.17 | 0.00129232 | 0.0457158  |
| AREG     | chr4:75480628-75490485    | 6.18 | 0.00010918 | 0.00818952 |
| AKAP13   | chr15:85923850-86292586   | 6.18 | 0.00034279 | 0.0186276  |
| GALNT7   | chr4:174089903-174245118  | 6.26 | 6.245E-05  | 0.00531405 |
| ZMYND8   | chr20:45837909-45986033   | 6.30 | 0.00046221 | 0.0227429  |
| ATP8B1   | chr18:55297533-55470327   | 6.31 | 9.6721E-05 | 0.00737369 |
| PIK3CB   | chr3:138371539-138553620  | 6.32 | 0.00041873 | 0.0211168  |
| HLTF     | chr3:148747903-148804341  | 6.33 | 8.6594E-05 | 0.00676735 |
| PRR11    | chr17:57232859-57284070   | 6.34 | 9.575E-06  | 0.00141377 |
| FAM72D   | chr1:143896451-143913143  | 6.36 | 0.00095061 | 0.0370294  |
| ITPK1    | chr14:93403258-93582263   | 6.36 | 0.00014188 | 0.0099435  |
| SLC39A11 | chr17:70642084-71088853   | 6.36 | 0.00094171 | 0.0367207  |
| RPS6KA3  | chrX:20168028-20284750    | 6.37 | 0.00044182 | 0.0220357  |
| WDHD1    | chr14:55405655-55493819   | 6.38 | 0.00033535 | 0.0183786  |
| CRIM1    | chr2:36583369-36778278    | 6.42 | 0.00056665 | 0.0261031  |
| SLC39A10 | chr2:196521531-196602426  | 6.42 | 0.00034357 | 0.0186276  |
| PARN     | chr16:14529556-14724128   | 6.43 | 0.00014084 | 0.00988931 |
| TBL1XR1  | chr3:176738541-176915048  | 6.43 | 0.00014768 | 0.010197   |
| GALNT3   | chr2:166604312-166650803  | 6.50 | 6.9819E-05 | 0.00574481 |
| MSH2     | chr2:47630201-47721087    | 6.50 | 1.5086E-05 | 0.00192121 |
| PRIM1    | chr12:57123939-57146146   | 6.53 | 0.00119137 | 0.0431249  |
| HMMR     | chr5:162887516-162930123  | 6.53 | 0.00109519 | 0.0408337  |
| VRK1     | chr14:97263683-97347951   | 6.53 | 0.00125981 | 0.0449061  |
| TTK      | chr6:80714321-80753270    | 6.54 | 0.00089957 | 0.035485   |
| ADK      | chr10:75910942-76469238   | 6.55 | 3.6352E-05 | 0.00379341 |
| CACNG4   | chr17:64960977-65031569   | 6.56 | 1.3833E-05 | 0.00185209 |
| MBNL2    | chr13:97874573-98046374   | 6.58 | 0.00067698 | 0.0296821  |
| IRS1     | chr2:227596032-227663506  | 6.60 | 2.0948E-05 | 0.00246567 |
| ANKRD28  | chr3:15708743-15901053    | 6.62 | 0.00010332 | 0.00778138 |
| ARHGAP39 | chr8:145754562-145911113  | 6.64 | 0.00140694 | 0.0481974  |
| MCF2L    | chr13:113623534-113754053 | 6.66 | 0.00088351 | 0.0351111  |
| PHF20    | chr20:34359922-34538288   | 6.67 | 0.00075828 | 0.0318631  |
| HERC3    | chr4:89513646-89629825    | 6.72 | 0.00124466 | 0.0445317  |
| EHMT1    | chr9:140513443-140730578  | 6.72 | 0.0011725  | 0.0427317  |
| BRCA1    | chr17:41196311-41277500   | 6.78 | 0.00073621 | 0.0312082  |
| VPS13A   | chr9:79791671-80032399    | 6.79 | 0.00097941 | 0.0377184  |
| WWC1     | chr5:167719064-167899308  | 6.79 | 0.00030289 | 0.0171286  |
| RTKN2    | chr10:63952952-64028466   | 6.80 | 0.00078213 | 0.0324995  |
| GPR160   | chr3:169755734-169805264  | 6.82 | 0.00035926 | 0.0191397  |
| UNC13B   | chr9:35161988-35405332    | 6.84 | 0.0003356  | 0.0183786  |
| ELOVL5   | chr6:53132195-53213977    | 6.86 | 0.00015318 | 0.0104612  |
| CDC42BPA | chr1:227177565-227505826  | 6.89 | 0.00035375 | 0.0189051  |
| PLS1     | chr3:142315228-142432505  | 6.92 | 0.00014753 | 0.010197   |
| EPB41L2  | chr6:131160487-131384462  | 6.95 | 0.00102606 | 0.0391119  |
| THBS1    | chr15:39873279-39889668   | 7.06 | 8.2552E-07 | 0.00024475 |
| RALGPS2  | chr1:178694299-178890942  | 7.06 | 0.00115475 | 0.0424159  |
| CCNY     | chr10:35535952-35860847   | 7.07 | 0.00034523 | 0.0186907  |
| STK39    | chr2:168810529-169104105  | 7.13 | 0.00051967 | 0.0245445  |
| RHOBTB3  | chr5:95066849-95132071    | 7.15 | 1.4579E-06 | 0.00038085 |
| PREX1    | chr20:47122554-47444481   | 7.22 | 3.4471E-07 | 0.00014004 |
| PTPN13   | chr4:87515467-87736328    | 7.24 | 0.00050761 | 0.0240945  |

|              |                           |      |            |            |
|--------------|---------------------------|------|------------|------------|
| MLL3         | chr7:151832009-152133090  | 7.24 | 5.4797E-05 | 0.00490275 |
| CCNA2        | chr4:122722471-122745088  | 7.29 | 3.4139E-05 | 0.00364755 |
| KIAA1324L    | chr7:86506222-86689014    | 7.32 | 0.00118075 | 0.0429485  |
| USP13        | chr3:179370932-179507321  | 7.33 | 0.00041699 | 0.0211069  |
| NBAS         | chr2:15307031-15701454    | 7.46 | 0.00110875 | 0.0411714  |
| STC2         | chr5:172741725-172756506  | 7.50 | 1.9476E-07 | 9.1801E-05 |
| ITGA2        | chr5:52285155-52390609    | 7.52 | 3.4499E-05 | 0.00367166 |
| TULP4        | chr6:158666238-158932858  | 7.52 | 0.00070128 | 0.0303557  |
| ANO6         | chr12:45566816-45834187   | 7.54 | 0.00021585 | 0.0134163  |
| LCLAT1       | chr2:30670122-30867091    | 7.59 | 0.00047142 | 0.0229804  |
| KIAA0922     | chr4:154387497-154558124  | 7.60 | 0.00061629 | 0.0277859  |
| CDK19        | chr6:110931180-111136412  | 7.65 | 0.00015558 | 0.0105668  |
| FAM72A       | chr1:206138910-206155074  | 7.65 | 0.00067283 | 0.0296396  |
| SPIRE1       | chr18:12446033-12657912   | 7.73 | 0.00028718 | 0.0165342  |
| KIF11        | chr10:94352824-94415152   | 7.74 | 2.8994E-06 | 0.00061366 |
| PDS5B        | chr13:33160563-33352158   | 7.75 | 1.1767E-05 | 0.00163508 |
| C6orf211     | chr6:151773421-151791232  | 7.78 | 4.5645E-07 | 0.00016717 |
| SRGAP1       | chr12:64238540-64541922   | 7.88 | 0.00033603 | 0.0183786  |
| KIF13B       | chr8:28924794-29120610    | 7.90 | 0.00032167 | 0.0178547  |
| COL4A5       | chrX:107683073-107940775  | 7.91 | 0.00121628 | 0.043772   |
| SLC25A13     | chr7:95749531-95951459    | 7.95 | 1.9988E-05 | 0.00238557 |
| ARHGAP10     | chr4:148653388-148993927  | 7.99 | 0.00087543 | 0.0348642  |
| SESTD1       | chr2:179966418-180129350  | 8.04 | 0.00089331 | 0.0354095  |
| NCOA2        | chr8:71022009-71316037    | 8.04 | 0.00014747 | 0.010197   |
| ARHGAP18     | chr6:129898239-130031370  | 8.10 | 0.00030921 | 0.0173847  |
| AR           | chrX:66763873-66950461    | 8.15 | 7.1012E-05 | 0.00583012 |
| KYNU         | chr2:143588843-143799885  | 8.16 | 4.4466E-05 | 0.00422669 |
| PIP4K2A      | chr10:22823765-23003503   | 8.23 | 0.00031007 | 0.0173847  |
| EPB41        | chr1:29213602-29450421    | 8.26 | 0.00038963 | 0.0201033  |
| CERS6        | chr2:169312758-169642939  | 8.34 | 0.00020616 | 0.0131198  |
| SLC26A2      | chr5:149340299-149366963  | 8.39 | 5.2278E-05 | 0.00480399 |
| EXT1         | chr8:118811601-119124058  | 8.40 | 0.00119688 | 0.0431927  |
| SP4          | chr7:21467688-21554151    | 8.43 | 0.00114272 | 0.0420152  |
| CIT          | chr12:120123408-120315104 | 8.44 | 0.00096541 | 0.0374106  |
| SMARCA2      | chr9:2015341-2193623      | 8.48 | 6.296E-05  | 0.00533319 |
| UHRF1        | chr19:4909509-4962222     | 8.49 | 5.603E-05  | 0.00495989 |
| CENPF        | chr1:214776531-214837914  | 8.49 | 1.4301E-05 | 0.00188766 |
| METTL15      | chr11:28129797-28355054   | 8.52 | 0.00100612 | 0.0384693  |
| TEAD1        | chr11:12695968-12966284   | 8.53 | 3.9378E-05 | 0.00397993 |
| ASAP2        | chr2:9346893-9545812      | 8.58 | 3.5427E-06 | 0.00069288 |
| IPO11,LRRC70 | chr5:61708572-61924416    | 8.59 | 0.00143944 | 0.0486183  |
| MED13L       | chr12:116391709-116715023 | 8.59 | 6.3186E-06 | 0.00101741 |
| PRIM2        | chr6:57182421-57513376    | 8.62 | 4.7205E-05 | 0.00447557 |
| RPS6KA5      | chr14:91337166-91526993   | 8.72 | 0.00098294 | 0.0377765  |
| MNAT1        | chr14:61201458-61435398   | 8.73 | 2.9819E-05 | 0.00329563 |
| PRKAR2B      | chr7:106685177-106802256  | 8.79 | 0.00144421 | 0.0486912  |
| STS          | chrX:7137471-7272682      | 8.82 | 0.00140297 | 0.0481703  |
| KIF14        | chr1:200520624-200589862  | 8.82 | 9.1048E-05 | 0.00702725 |
| SNX10        | chr7:26331514-26413949    | 8.84 | 0.00037717 | 0.0197548  |
| SIPA1L2      | chr1:232533641-232697222  | 8.89 | 6.6407E-05 | 0.00552701 |
| PDSS2        | chr6:107473760-107780779  | 8.97 | 0.00024984 | 0.014957   |
| MBNL3        | chrX:131503342-131624046  | 9.17 | 0.00035371 | 0.0189051  |
| SH3PXD2B     | chr5:171760502-171881527  | 9.23 | 0.00098172 | 0.0377682  |
| LRBA         | chr4:151185624-151936649  | 9.36 | 9.7857E-05 | 0.00744509 |
| TRIO         | chr5:14143828-14510146    | 9.37 | 0.00070653 | 0.0305344  |
| FAM117B      | chr2:203499900-203634480  | 9.43 | 0.00062919 | 0.0282646  |
| RBM47        | chr4:40425271-40632738    | 9.46 | 1.4293E-06 | 0.00037867 |
| FUT9         | chr6:96463844-96663488    | 9.51 | 4.5584E-06 | 0.00081108 |
| FND3A        | chr13:49550047-49783915   | 9.52 | 6.5833E-05 | 0.00550828 |
| TMEM135      | chr11:86748885-87039876   | 9.63 | 0.00011668 | 0.00859725 |
| GPR126       | chr6:142623055-142767480  | 9.63 | 3.3389E-08 | 2.4457E-05 |
| SLC16A7      | chr12:59989888-60179734   | 9.70 | 0.0001272  | 0.00919104 |
| PLEKHA5      | chr12:19282625-19529333   | 9.72 | 0.00039662 | 0.0203797  |
| KCNK5        | chr6:39156746-39197251    | 9.76 | 0.00050939 | 0.0241279  |
| ADD3         | chr10:111705316-111895323 | 9.79 | 0.00110654 | 0.0411516  |
| SH3RF1       | chr4:170015406-170192249  | 9.86 | 0.00024687 | 0.0148986  |
| SCFD2        | chr4:53739150-54232242    | 9.87 | 0.00021456 | 0.0133811  |
| ASAP1        | chr8:131029374-131455906  | 9.91 | 2.8642E-06 | 0.00061141 |

|          |                           |       |            |            |
|----------|---------------------------|-------|------------|------------|
| FAM102B  | chr1:109102970-109181949  | 9.95  | 2.8255E-08 | 2.2457E-05 |
| PBX1     | chr1:164528595-164823469  | 9.97  | 3.9585E-06 | 0.00075062 |
| RTTN     | chr18:67671042-67872962   | 10.02 | 0.00057127 | 0.0262812  |
| RANBP17  | chr5:170288895-170727019  | 10.03 | 0.00084571 | 0.0339337  |
| NEO1     | chr15:73344824-73597547   | 10.09 | 1.0046E-05 | 0.00146026 |
| PTK2     | chr8:141668480-142011412  | 10.10 | 5.0701E-05 | 0.00471136 |
| FAM72B   | chr1:120839004-120855681  | 10.10 | 0.00048659 | 0.023364   |
| CXCR7    | chr2:237478379-237490994  | 10.11 | 3.4488E-07 | 0.00014004 |
| ALCAM    | chr3:105085556-105295757  | 10.15 | 1.44E-06   | 0.00037881 |
| ZNF618   | chr9:116638561-116818875  | 10.23 | 4.0483E-05 | 0.00403618 |
| SLC41A2  | chr12:105197249-105352049 | 10.26 | 0.00108545 | 0.0406699  |
| IL1R1    | chr2:102770401-102796334  | 10.30 | 0.00012029 | 0.00877614 |
| C1orf21  | chr1:184356149-184598155  | 10.33 | 6.5897E-06 | 0.00105198 |
| FAF1     | chr1:50905240-51425936    | 10.34 | 2.1733E-05 | 0.0025213  |
| -        | chr12:60179942-60183516   | 10.37 | 0.00040198 | 0.0205139  |
| SRGAP2P2 | chr1:143914207-144094477  | 10.38 | 0.00047185 | 0.0229804  |
| WWC2     | chr4:184020462-184241929  | 10.46 | 0.00013254 | 0.00943076 |
| XPR1     | chr1:180601145-180859415  | 10.55 | 1.5588E-06 | 0.00039866 |
| NDC80    | chr18:2571509-2616634     | 10.59 | 0.00031892 | 0.0177544  |
| CA12     | chr15:63615729-63674075   | 10.60 | 2.2603E-05 | 0.00260603 |
| ZNRF3    | chr22:29279754-29453476   | 10.62 | 0.00048218 | 0.0232417  |
| KIAA0146 | chr8:48173488-48648563    | 10.67 | 0.00081861 | 0.0333189  |
| ZSWIM5   | chr1:45482075-45672250    | 10.86 | 0.0007869  | 0.0325759  |
| ARL13B   | chr3:93698982-93774522    | 10.89 | 0.00071574 | 0.0307678  |
| ZHX2     | chr8:123792497-124014800  | 11.02 | 0.00018465 | 0.0121015  |
| RASSF8   | chr12:26107587-26232825   | 11.10 | 4.881E-06  | 0.00084806 |
| EXOC4    | chr7:132937822-133750579  | 11.18 | 0.00019944 | 0.0128487  |
| JAK2     | chr9:4985244-5128183      | 11.31 | 5.4518E-05 | 0.00489563 |
| SASH1    | chr6:148663728-148873184  | 11.31 | 0.00011723 | 0.00860338 |
| CABLES1  | chr18:20714527-20840434   | 11.36 | 5.8655E-05 | 0.00510751 |
| VAT1L    | chr16:7822482-78014001    | 11.46 | 0.00027197 | 0.0158992  |
| SFMBT2   | chr10:7200585-7453448     | 11.47 | 0.00026508 | 0.0155453  |
| SORL1    | chr11:121322911-121504471 | 11.53 | 7.217E-05  | 0.00586085 |
| NEBL     | chr10:21068902-21463852   | 11.65 | 1.546E-06  | 0.0003983  |
| FREM2    | chr13:39261172-39461267   | 11.69 | 1.0888E-06 | 0.00031048 |
| DPYSL2   | chr8:26371708-26515693    | 11.70 | 0.00025025 | 0.014957   |
| DEPDC1B  | chr5:59892738-59995993    | 11.73 | 0.00025184 | 0.015014   |
| TBC1D5   | chr3:17198653-17784240    | 11.79 | 1.9296E-05 | 0.00234028 |
| WDR70    | chr5:37379411-37752774    | 11.80 | 7.7281E-05 | 0.0061686  |
| VAV2     | chr9:136627015-136857482  | 11.85 | 4.1981E-06 | 0.00077839 |
| CRADD    | chr12:94071150-94244531   | 11.85 | 0.00078349 | 0.0325201  |
| C6orf97  | chr6:151815174-151942451  | 11.87 | 1.3756E-05 | 0.0018484  |
| NFIB     | chr9:14081841-14398982    | 11.98 | 0.0002097  | 0.0131796  |
| PRKCA    | chr17:64298925-64806862   | 12.49 | 7.9776E-05 | 0.00631433 |
| ADAMTS19 | chr5:128795974-129074588  | 12.50 | 0.00030078 | 0.0171152  |
| CTDSPL   | chr3:37903668-38025960    | 12.56 | 0.00032981 | 0.0181986  |
| SIPA1L3  | chr19:38397867-38699008   | 12.57 | 4.3316E-05 | 0.00417043 |
| FGD4     | chr12:32655040-32798984   | 12.62 | 0.00021864 | 0.0135223  |
| PMP22    | chr17:15133095-15168644   | 12.64 | 5.234E-05  | 0.00480399 |
| ANK3     | chr10:61786055-62493284   | 12.65 | 0.00013826 | 0.00980055 |
| CEP128   | chr14:80962820-81408057   | 12.66 | 0.00096115 | 0.0373207  |
| SYTL5    | chrX:37765066-37988073    | 12.66 | 1.0405E-05 | 0.00150074 |
| TBC1D4   | chr13:75858808-76056267   | 12.76 | 4.8244E-05 | 0.00456258 |
| DDAH1    | chr1:85784167-86044046    | 12.83 | 4.4018E-06 | 0.00079436 |
| GULP1    | chr2:189156395-189460652  | 12.87 | 7.1632E-05 | 0.00584523 |
| HIPK2    | chr7:139246315-139477693  | 12.93 | 3.8004E-05 | 0.00388594 |
| GAS2L3   | chr12:100967465-101022041 | 12.95 | 0.00143847 | 0.0486183  |
| DCDC2    | chr6:24171982-24383520    | 13.08 | 4.1516E-06 | 0.00077839 |
| MYO10    | chr5:16662015-16936385    | 13.12 | 4.7482E-06 | 0.00083216 |
| STK3     | chr8:99466858-99954799    | 13.23 | 3.1592E-05 | 0.00347102 |
| AIM1     | chr6:106808687-107018334  | 13.29 | 9.6563E-06 | 0.00141459 |
| NCOA1    | chr2:24714421-24993570    | 13.34 | 8.4776E-06 | 0.00127697 |
| SDC2     | chr8:97505881-97624037    | 13.34 | 0.00084325 | 0.0339181  |
| WIPF1    | chr2:175424301-175547627  | 13.34 | 0.0001466  | 0.010197   |
| MPP7     | chr10:28339922-28591846   | 13.35 | 1.4121E-05 | 0.00187719 |
| BEND3    | chr6:107386384-107435636  | 13.46 | 0.00013682 | 0.00971676 |
| CAMK2D   | chr4:114372187-114683083  | 13.61 | 0.00136402 | 0.0474435  |
| PRKCH    | chr14:61788514-62017698   | 13.67 | 0.00103273 | 0.039286   |

|            |                           |       |            |            |
|------------|---------------------------|-------|------------|------------|
| FNDC3B     | chr3:171757417-172118492  | 13.76 | 0.0013925  | 0.047943   |
| GREB1      | chr2:11622955-11782964    | 13.77 | 9.2378E-06 | 0.00138035 |
| THADA      | chr2:43457974-43823185    | 14.05 | 0.00046816 | 0.0228909  |
| ESR1       | chr6:152011630-152424580  | 14.28 | 2.3032E-05 | 0.00262423 |
| PDZRN3     | chr3:73431651-73674072    | 14.29 | 0.00079748 | 0.0327914  |
| NFATC2     | chr20:50003503-50179168   | 14.32 | 0.00104638 | 0.039724   |
| TRPS1      | chr8:116420723-116681328  | 14.42 | 1.2059E-07 | 6.1707E-05 |
| FUT8       | chr14:65877309-66210839   | 14.53 | 2.042E-07  | 9.4174E-05 |
| NPAS2      | chr2:101436612-101613287  | 14.54 | 0.00079749 | 0.0327914  |
| LMNB1      | chr5:126112314-126172712  | 14.56 | 4.0696E-08 | 2.9235E-05 |
| AFAP1L2    | chr10:116054582-116164515 | 14.60 | 0.00073685 | 0.0312082  |
| -          | chr12:131717235-131719769 | 14.75 | 0.0010297  | 0.0392106  |
| GNAQ       | chr9:80331021-80646219    | 14.89 | 4.0871E-05 | 0.0040498  |
| ITPR2      | chr12:26488284-26986131   | 14.99 | 5.9216E-06 | 0.0009788  |
| TNS3       | chr7:47314751-47621742    | 15.03 | 1.7549E-06 | 0.00042875 |
| EML1       | chr14:100259744-100408395 | 15.22 | 4.3535E-05 | 0.00418075 |
| TRERF1     | chr6:42192668-42419872    | 15.42 | 1.512E-05  | 0.00192121 |
| RALGAPA2   | chr20:20370207-20693266   | 15.68 | 5.6629E-07 | 0.00019406 |
| MME        | chr3:154742007-154901529  | 15.73 | 0.0007312  | 0.0311457  |
| WDR7       | chr18:54318615-54697036   | 15.89 | 0.00018322 | 0.0120497  |
| PTPRK      | chr6:128289923-128841870  | 16.19 | 1.9673E-09 | 2.4497E-06 |
| FBXL17     | chr5:107194733-107717799  | 16.23 | 0.00022038 | 0.0136072  |
| SVIL       | chr10:29745950-30024737   | 16.31 | 1.4671E-05 | 0.00190571 |
| TBC1D22A   | chr22:47158517-47571342   | 16.59 | 7.1665E-05 | 0.00584523 |
| RNGTT      | chr6:89319988-89673348    | 16.75 | 3.5783E-06 | 0.0006962  |
| MAGI3      | chr1:113933149-114230519  | 16.78 | 9.0554E-05 | 0.00700358 |
| XXYL1      | chr3:194788676-194991895  | 16.89 | 0.00038627 | 0.0200129  |
| JPH1       | chr8:75146938-75233670    | 17.47 | 3.4873E-06 | 0.00068691 |
| CAMKMT     | chr2:44589042-44999729    | 17.48 | 0.00111835 | 0.0414453  |
| TMEM164    | chrX:109245862-109421016  | 17.49 | 8.018E-05  | 0.00631433 |
| SRGAP2     | chr1:206516199-206637783  | 17.58 | 9.3602E-05 | 0.00716515 |
| TBL1X      | chrX:9431334-9687780      | 17.69 | 2.5126E-06 | 0.0005457  |
| PARD3      | chr10:34398487-35104253   | 17.86 | 3.396E-05  | 0.00364755 |
| PSD3       | chr8:18384812-18871196    | 18.00 | 2.5657E-08 | 2.0836E-05 |
| FAM172A    | chr5:92953430-93447404    | 18.02 | 4.3575E-06 | 0.00079018 |
| WDR19      | chr4:39184023-39287430    | 18.03 | 0.0006202  | 0.0279133  |
| JARID2     | chr6:15245805-15522253    | 18.03 | 4.9134E-06 | 0.00084975 |
| STAG1      | chr3:136054668-136471245  | 18.37 | 5.5346E-07 | 0.00019335 |
| PPM1H      | chr12:63037762-63328665   | 18.46 | 2.3948E-07 | 0.00010778 |
| -          | chr10:9012174-9016319     | 18.65 | 0.00065417 | 0.0291553  |
| PPP3CA     | chr4:101944586-102268628  | 18.66 | 5.8699E-11 | 2.1275E-07 |
| JAKMIP2    | chr5:146939556-147162268  | 18.71 | 2.3808E-06 | 0.00052939 |
| THSD4      | chr15:71407946-72075722   | 18.80 | 3.5747E-05 | 0.00376519 |
| MPP6       | chr7:24613084-24729244    | 18.81 | 0.00047245 | 0.0229804  |
| IGFBP5     | chr2:217536827-217560272  | 19.24 | 2.478E-12  | 1.5428E-08 |
| DEPTOR     | chr8:120885899-121063157  | 19.60 | 0.00015839 | 0.0107189  |
| LRRC20     | chr10:72058728-72142382   | 19.66 | 4.2456E-05 | 0.0041517  |
| KIFAP3     | chr1:169890466-170043879  | 20.03 | 7.9572E-05 | 0.00631433 |
| NECAB1     | chr8:91803920-91997485    | 20.12 | 3.4938E-06 | 0.00068691 |
| NCAM2      | chr21:22370632-22912741   | 20.19 | 1.6493E-06 | 0.00041349 |
| CSGALNACT1 | chr8:19261311-19540261    | 20.25 | 0.00041514 | 0.0210421  |
| EEFSEC     | chr3:127872312-128127489  | 20.38 | 6.1072E-05 | 0.00524457 |
| PGR        | chr11:100900354-101000544 | 20.41 | 3.7422E-06 | 0.00072432 |
| MYB        | chr6:135502452-135540311  | 20.44 | 0.00021074 | 0.0131997  |
| CMIP       | chr16:81478774-81745367   | 20.59 | 4.1089E-05 | 0.00404989 |
| ARID1B     | chr6:157099063-157531913  | 20.66 | 2.0034E-06 | 0.00047351 |
| PPM1L      | chr3:160473995-160793360  | 20.69 | 2.2788E-05 | 0.00261128 |
| IKZF2      | chr2:213864410-214016333  | 20.70 | 7.4816E-05 | 0.00604944 |
| GFRA1      | chr10:117816435-118033126 | 20.72 | 2.53E-10   | 4.7256E-07 |
| MAP2K5     | chr15:67835020-68099455   | 20.75 | 0.00012905 | 0.00928889 |
| HLCS       | chr21:38123188-38362545   | 20.80 | 0.00137784 | 0.0476578  |
| BUB1B,PAK6 | chr15:40453209-40569688   | 21.07 | 1.6632E-05 | 0.00206864 |
| -          | chr13:23489827-23492386   | 21.25 | 9.5952E-05 | 0.00732999 |
| DDX10      | chr11:108535815-108811648 | 21.26 | 1.7587E-06 | 0.00042875 |
| EYA2       | chr20:45523262-45817492   | 21.27 | 0.00060972 | 0.0276081  |
| ATP8A1     | chr4:42410391-42659122    | 21.88 | 0.00020974 | 0.0131796  |
| RAB30      | chr11:82688389-82782884   | 21.98 | 4.2591E-05 | 0.0041517  |
| CDCA7L     | chr7:21582832-21985542    | 22.06 | 0.00066591 | 0.0294736  |

|              |                          |       |            |            |
|--------------|--------------------------|-------|------------|------------|
| BBX          | chr3:107241782-107530049 | 22.19 | 1.1936E-07 | 6.1707E-05 |
| CAB39L       | chr13:49882785-50018221  | 22.56 | 0.00024502 | 0.0148106  |
| PEAK1        | chr15:77400497-77712446  | 22.67 | 3.1909E-06 | 0.00065136 |
| EXOC6        | chr10:94594469-94819251  | 22.79 | 1.6606E-06 | 0.00041355 |
| MAN1A1       | chr6:119498385-119670926 | 22.90 | 3.83E-06   | 0.00073565 |
| STARD13      | chr13:33677271-34250932  | 23.11 | 3.5882E-05 | 0.00376519 |
| GPC6         | chr13:93879077-95060273  | 23.19 | 1.3272E-07 | 6.69E-05   |
| RPTOR        | chr17:78518624-78940173  | 23.38 | 2.4116E-06 | 0.00053307 |
| ST8SIA6      | chr10:17357417-17497584  | 23.69 | 1.0872E-06 | 0.00031048 |
| ADAM22       | chr7:87563565-87832204   | 23.86 | 0.0011646  | 0.0425684  |
| PLCB1        | chr20:8113295-8865547    | 24.00 | 4.3044E-07 | 0.0001608  |
| DOCK9        | chr13:99445740-99738660  | 24.13 | 0.00040367 | 0.0205722  |
| SGCG         | chr13:23733218-23899304  | 24.16 | 0.00033685 | 0.0183967  |
| FGF12        | chr3:191857181-192445388 | 24.42 | 5.8031E-06 | 0.00097649 |
| UBE2E2       | chr3:23244649-23648882   | 24.82 | 9.8519E-06 | 0.0014376  |
| FIGN         | chr2:164464117-164592513 | 25.11 | 6.5155E-05 | 0.00546951 |
| PLCB4        | chr20:9049700-9461462    | 25.23 | 1.3374E-06 | 0.00036203 |
| ZNF704       | chr8:81540685-81787016   | 25.56 | 1.7163E-06 | 0.00042459 |
| FGF13        | chrX:137713733-138287185 | 25.68 | 0.0001016  | 0.00768323 |
| FTO          | chr16:53737874-54148379  | 25.86 | 5.3379E-07 | 0.00018991 |
| CAMK1D       | chr10:12391582-12877545  | 26.43 | 0.00128795 | 0.0456645  |
| GRB10        | chr7:50657759-50861159   | 26.64 | 0.00027371 | 0.0159326  |
| CCDC91       | chr12:28343321-28703099  | 27.17 | 7.5725E-05 | 0.00608339 |
| CDKAL1       | chr6:20534687-21232634   | 27.23 | 2.2789E-06 | 0.00051283 |
| HSD17B11     | chr4:88257690-88312455   | 27.38 | 6.0787E-06 | 0.00098302 |
| SCAPER       | chr15:76640526-77176217  | 27.49 | 9.2474E-05 | 0.00710791 |
| TMTC2        | chr12:83080933-83528067  | 27.52 | 2.0942E-06 | 0.00047993 |
| SATB2        | chr2:200134222-200337481 | 27.61 | 0.00025022 | 0.014957   |
| GPC5         | chr13:92050934-93519487  | 27.88 | 0.00073095 | 0.0311457  |
| MGAT5        | chr2:135010710-135212192 | 27.88 | 5.695E-08  | 3.695E-05  |
| ERC1         | chr12:1099718-1605100    | 28.07 | 2.9387E-07 | 0.00012618 |
| ZMAT4        | chr8:40388110-40755343   | 28.13 | 0.00107327 | 0.0404573  |
| ST7          | chr7:116592500-116870201 | 28.44 | 0.0007953  | 0.0327914  |
| COL12A1      | chr6:75794041-75915895   | 28.58 | 4.9891E-08 | 3.3886E-05 |
| SNX29        | chr16:12070601-12668146  | 28.73 | 1.3936E-06 | 0.00037184 |
| LRRC16A      | chr6:25279655-25620758   | 28.89 | 1.1629E-07 | 6.1182E-05 |
| MID1         | chrX:10413349-10851809   | 28.93 | 6.5912E-05 | 0.00550828 |
| GREB1L       | chr18:18822202-19105372  | 29.14 | 6.9643E-05 | 0.00574297 |
| LDLRAD3      | chr11:35965611-36253632  | 29.94 | 0.00061154 | 0.0276568  |
| LARGE        | chr22:33669061-34316416  | 29.98 | 3.0086E-07 | 0.00012772 |
| NBEA         | chr13:35516423-36705514  | 30.53 | 3.3048E-06 | 0.00066732 |
| SIPA1L1      | chr14:71787185-72207701  | 30.87 | 2.0962E-08 | 1.9099E-05 |
| VAV3         | chr1:108113781-108507545 | 31.24 | 0.00023897 | 0.0144682  |
| MAP3K5       | chr6:136878186-137113656 | 31.41 | 0.00017506 | 0.011595   |
| REEP1        | chr2:86441119-86565206   | 32.46 | 0.00095467 | 0.0371486  |
| -            | chr11:82684281-82686552  | 33.99 | 7.6276E-05 | 0.00611454 |
| TP63         | chr3:189349215-189615068 | 35.14 | 0.00113774 | 0.0419147  |
| XRCC4        | chr5:82373316-82649579   | 35.30 | 6.2808E-05 | 0.00533239 |
| -            | chr5:67096878-67104649   | 35.35 | 5.8167E-05 | 0.00508871 |
| SLC6A14      | chrX:115567746-115592625 | 35.64 | 1.9611E-10 | 3.8558E-07 |
| PRLR         | chr5:35048860-35230823   | 36.07 | 0.0006017  | 0.0273473  |
| SYT1         | chr12:79257772-79845788  | 36.11 | 3.8598E-06 | 0.00073565 |
| ELOVL6       | chr4:110967047-111119820 | 36.47 | 1.6834E-05 | 0.00206864 |
| APBB2        | chr4:40812043-41216635   | 37.13 | 3.8451E-09 | 4.3434E-06 |
| EFNA5        | chr5:106712589-107006596 | 38.41 | 4.325E-06  | 0.00078863 |
| GJA1         | chr6:121756744-121770873 | 38.88 | 1.7734E-08 | 1.6561E-05 |
| UST          | chr6:149068270-149398126 | 41.05 | 0.00136879 | 0.0475651  |
| BMPRI1B      | chr4:95679127-96079601   | 41.15 | 4E-07      | 0.00015247 |
| C18orf1      | chr18:13217538-13652753  | 44.12 | 8.965E-08  | 5.2328E-05 |
| ROBO1        | chr3:78646387-79817059   | 45.53 | 1.9414E-09 | 2.4497E-06 |
| NEGR1        | chr1:71868624-72748277   | 48.24 | 4.2091E-06 | 0.00077839 |
| EYA4         | chr6:133562479-133853258 | 48.56 | 3.8411E-05 | 0.00389912 |
| CADPS2       | chr7:121958477-122526813 | 49.13 | 0.00010607 | 0.00797264 |
| SLCO3A1      | chr15:92396937-92715665  | 49.21 | 0.00071229 | 0.0307211  |
| SAMD12       | chr8:119201694-119738306 | 50.12 | 2.0154E-06 | 0.00047351 |
| NFIA         | chr1:61542945-61928460   | 52.90 | 7.5235E-07 | 0.00023818 |
| LOC100507421 | chr7:140774031-141180179 | 54.68 | 9.8774E-09 | 9.7101E-06 |
| SULF1        | chr8:70378858-70573147   | 54.96 | 3.1147E-06 | 0.00064284 |



|         |                          |        |            |            |
|---------|--------------------------|--------|------------|------------|
| MAGI1   | chr3:65339204-66024509   | 55.54  | 1.0443E-07 | 5.789E-05  |
| HS6ST3  | chr13:96743092-97491816  | 61.53  | 5.0016E-07 | 0.00017965 |
| PLCH1   | chr3:155197670-155422053 | 61.75  | 2.099E-05  | 0.00246567 |
| PPP1R9A | chr7:94536948-94925727   | 66.66  | 8.1845E-06 | 0.00124284 |
| KCNJ8   | chr12:21917888-21927747  | 67.24  | 1.2001E-06 | 0.00033327 |
| -       | chr3:160793476-160796882 | 67.30  | 1.0653E-05 | 0.00152475 |
| MLLT3   | chr9:20344967-20622514   | 67.45  | 0.000252   | 0.015014   |
| PLXDC2  | chr10:20078880-20578372  | 69.86  | 8.6254E-07 | 0.0002519  |
| -       | chr5:108530016-108532266 | 72.26  | 0.00109723 | 0.0408654  |
| SEMA5A  | chr5:9035137-9546233     | 75.23  | 3.7838E-07 | 0.00015037 |
| ERBB4   | chr2:212240441-213403352 | 80.93  | 3.8487E-06 | 0.00073565 |
| LTBP1   | chr2:33172368-33624575   | 94.44  | 4.9652E-08 | 3.3886E-05 |
| TIAM1   | chr21:32490735-32931290  | 146.00 | 0.00011381 | 0.00841867 |
| GPHN    | chr14:66974124-67648525  | 159.40 | 6.1825E-08 | 3.8493E-05 |

*The genomic location of gene, the value for controls and cisplatin-treated MCF7 cells, the fold change, the q-value and p-value were indicated.*
