# Supplementary material for: Role of the splicing factor SRSF4 in cisplatin-induced modifications of pre-mRNA splicing and apoptosis
Source: PubMed Central journal article supplement (PMC4399393; doi:10.1186/s12885-015-1259-0), 2015-04-07
Supplement: 12885_2015_1259_MOESM4_ESM.pdf [file 12885_2015_1259_MOESM4_ESM.pdf]

**Additional file 4. Post-transcriptional events, from RNA-Seq in control and cisplatin-treated MCF7 cells.**

| Gene Symbol | RPKM MCF7 Control | RPKM MCF7+ Cisplatin | Alt Splice RPKM | Alt Protein RPKM | Splice Events                      | Uniprot Events                                                                                   |
|-------------|-------------------|----------------------|-----------------|------------------|------------------------------------|--------------------------------------------------------------------------------------------------|
| ABCB6       | 11                | 55                   | 0               | 6                | PS-                                | t (2)                                                                                            |
| ABCC3       | 16                | 16                   | 0               | 0                | PS+                                |                                                                                                  |
| ABCD4       | 9                 | 11                   | 2               | 0                | ES- (18.2)                         |                                                                                                  |
| ACAD8       | 10                | 9                    | 0               | 9                | ES+ (2, 3, 4)                      |                                                                                                  |
| ACIN1       | 24                | 29                   | 3               | 22               | ES- (4), ES+ (9.3)                 | D (1), D (1), D (1), r (1)                                                                       |
| ACOT2       | 8                 | 7                    | 1               | 0                | ES- (2.3)                          |                                                                                                  |
| ACOT9       | 11                | 8                    | 1               | 8                | ES+ (6)                            |                                                                                                  |
| ACP1        | 54                | 52                   | 3               | 18               | ES+ (4.1)                          |                                                                                                  |
| ACP6        | 16                | 7                    | 2               | 10               | AT+ (7)                            |                                                                                                  |
| ACYP1       | 7                 | 7                    | 3               | 0                | ES+ (4)                            |                                                                                                  |
| ADAM15      | 44                | 57                   | 1               | 23               | ES+ (20.2), ES- (20.1), ES- (21.1) | D (18), T (18)                                                                                   |
| ADD1        | 39                | 28                   | 2               | 9                | AP- (1)                            | R (19), R (19)                                                                                   |
| ADI1        | 32                | 39                   | 2               | 11               | AP+ (2)                            |                                                                                                  |
| ADNP        | 47                | 31                   | 2               | 0                | ES+ (2), AP+ (4.1)                 |                                                                                                  |
| ADPGK       | 33                | 38                   | 1               | 7                | AP- (1.1)                          |                                                                                                  |
| AEBP2       | 18                | 10                   | 1               | 5                | AP+ (2.1)                          | R (6), D (6), R (2.3), D (2.3)                                                                   |
| AFMID       | 5                 | 7                    | 1               | 0                | ES- (10, 11.1)                     |                                                                                                  |
| AIG1        | 18                | 6                    | 2               | 9                | AT+ (3)                            |                                                                                                  |
| AK2         | 32                | 38                   | 1               | 11               | AT- (6)                            | B (3), R (3), s (3), D (3), R (3)                                                                |
| AKAP17A     | 8                 | 28                   | 2               | 11               | ES- (4.2, 4.3), AT+ (4.4)          |                                                                                                  |
| AKAP9       | 27                | 16                   | 3               | 20               | ES+ (28.2)                         |                                                                                                  |
| AKT1S1      | 14                | 31                   | 3               | 6                | ES- (2.3)                          |                                                                                                  |
| ALDOA       | 1008              | 1172                 | 1               | 0                | ES+ (6.2)                          |                                                                                                  |
| ALG3        | 23                | 26                   | 2               | 15               | ES+ (2.2)                          | t (2.1)                                                                                          |
| ALG8        | 49                | 21                   | 0               | 11               | ES- (14)                           | t (15), t (15)                                                                                   |
| ALKBH2      | 18                | 25                   | 0               | 6                | ES- (3)                            | R (4), m (4), R (3), D (4), R (3), R (4), R (3), R (3), m (4), D (4), B (4), D (4), D (3), m (4) |
| AMD1        | 51                | 23                   | 1               | 26               | ES+ (3, 4, 5), ES+ (4, 5)          | A (1), D (4), D (4), B (4), S (4), p (1), B (1), A (4), D (4), p (1), A (1), A (4)               |
| AMZ2        | 80                | 154                  | 8               | 40               | ES+ (3)                            |                                                                                                  |
| ANKRD46     | 5                 | 12                   | 2               | 7                | ES- (3)                            |                                                                                                  |
| ANP32E      | 75                | 29                   | 2               | 8                | ES+ (5.1, 5.2)                     |                                                                                                  |
| ANXA2       | 513               | 478                  | 7               | 0                | ES+ (2)                            |                                                                                                  |
| AP4B1       | 18                | 16                   | 1               | 3                | AP+ (1.1)                          |                                                                                                  |
| AP4E1       | 16                | 16                   | 0               | 10               | PS+                                |                                                                                                  |
| API5        | 50                | 64                   | 2               | 15               | AT+ (14.2)                         | s (1)                                                                                            |
| APTX        | 12                | 16                   | 4               | 3                | ES+ (10), PS+                      | D (2), M (7.4), D (5.2), D (5.2), R (2)                                                          |
| AQR         | 9                 | 6                    | 0               | 0                | ES- (29.2)                         |                                                                                                  |
| ARFRP1      | 11                | 12                   | 0               | 1                | AP+ (3.1)                          | R (8)                                                                                            |
| ARHGAP12    | 26                | 13                   | 2               | 13               | ES+ (8)                            | R (5), D (5)                                                                                     |
| ARHGEF12    | 21                | 10                   | 2               | 11               | ES+ (5)                            |                                                                                                  |
| ARID4B      | 11                | 5                    | 1               | 7                | ES- (18)                           |                                                                                                  |
| ARIH2       | 13                | 17                   | 3               | 0                | ES- (5), PS+                       |                                                                                                  |
| ARL6IP4     | 48                | 54                   | 3               | 27               | ES- (3.1)                          |                                                                                                  |
| ARL8B       | 39                | 32                   | 2               | 12               | AT+ (3.3)                          | R (1.3), i (1.3), R (4), R (6), i (1.3)                                                          |
| ARNT        | 20                | 16                   | 3               | 18               | ES+ (7)                            |                                                                                                  |
| ASCC1       | 15                | 7                    | 2               | 10               | ES- (16)                           |                                                                                                  |
| ASL         | 13                | 14                   | 1               | 4                | AP- (2.1)                          |                                                                                                  |
| ASNS        | 75                | 76                   | 2               | 3                | ES- (2.3)                          | D (4.2), D (4.2)                                                                                 |
| ATG9A       | 8                 | 11                   | 1               | 10               | AP- (1)                            |                                                                                                  |
| ATP1B3      | 70                | 64                   | 2               | 11               | ES+ (4, 5, 6, 8)                   | s (6), D (3), T (3), D (5), D (5), s (5), g (5), s (5), D (6), g (9)                             |
| ATP2A3      | 36                | 32                   | 1               | 6                | ES- (21.2)                         | D (20), T (20)                                                                                   |
| ATP2C1      | 30                | 16                   | 1               | 15               | ES+ (29.1)                         | D (3.3), t (28), T (3.3), R (28), T (29.1), D (29.1)                                             |
| ATP5C1      | 249               | 247                  | 7               | 103              | ES+ (9)                            |                                                                                                  |
| ATP6AP2     | 82                | 149                  | 3               | 32               | ES+ (4, 5.1, 5.3), ES+ (5.1, 5.3)  | D (2), D (1), p (1), T (2)                                                                       |
| ATP6V0B     | 40                | 84                   | 3               | 19               | ES- (7.2)                          | D (2.2), T (1.1), R (1.1), D (7.1), T (7.1), t (1.1), T (2.2)                                    |
| ATP6V1D     | 25                | 53                   | 2               | 12               | ES+ (7)                            |                                                                                                  |
| AURKA       | 70                | 17                   | 1               | 2                | ES- (3)                            | D (7), D (7)                                                                                     |

|           |     |     |    |    |                                     |                                                                                                    |
|-----------|-----|-----|----|----|-------------------------------------|----------------------------------------------------------------------------------------------------|
| B2M       | 61  | 116 | 3  | 0  | AT+ (2.8)                           |                                                                                                    |
| B3GALNT1  | 45  | 14  | 1  | 0  | ES- (8)                             | g (9.2), g (9.2), g (9.2), R (9.1), T (9.1), g (9.2)                                               |
| B4GALT3   | 7   | 12  | 3  | 0  | ES+ (3.5)                           |                                                                                                    |
| BAG5      | 32  | 51  | 0  | 13 | AP- (2.1)                           |                                                                                                    |
| BAX       | 41  | 119 | 5  | 12 | ES- (5)                             | t (6.4), M (6.1), R (6.1)                                                                          |
| BCAS1     | 22  | 8   | 1  | 12 | ES+ (11)                            |                                                                                                    |
| BCL7B     | 25  | 27  | 0  | 8  | PS+                                 |                                                                                                    |
| BLOC1S2   | 34  | 131 | 2  | 19 | AP+ (2.1)                           |                                                                                                    |
| BRD3      | 10  | 8   | 1  | 0  | AP- (2)                             |                                                                                                    |
| BRPF3     | 12  | 19  | 0  | 0  | PS-                                 |                                                                                                    |
| BTF3      | 381 | 687 | 7  | 55 | ES- (1.2)                           |                                                                                                    |
| BTN2A1    | 6   | 17  | 0  | 7  | ES+ (4)                             |                                                                                                    |
| BUD31     | 64  | 81  | 4  | 8  | ES- (4)                             | M (3.2)                                                                                            |
| C11orf48  | 28  | 23  | 0  | 3  | ES- (1.6)                           |                                                                                                    |
| C11orf57  | 6   | 7   | 2  | 0  | ES- (2.2, 2.3)                      |                                                                                                    |
| C11orf82  | 12  | 17  | 2  | 9  | ES- (3)                             |                                                                                                    |
| C12orf10  | 34  | 39  | 2  | 19 | AP+ (1.2)                           |                                                                                                    |
| C12orf29  | 9   | 9   | 1  | 0  | ES+ (6.1)                           |                                                                                                    |
| C12orf41  | 18  | 43  | 0  | 15 | AT- (7)                             |                                                                                                    |
| C14orf101 | 7   | 6   | 1  | 0  | ES+ (12)                            |                                                                                                    |
| C14orf118 | 9   | 18  | 3  | 12 | AP- (1.1)                           |                                                                                                    |
| C14orf2   | 74  | 106 | 8  | 6  | ES- (7.2), AT+ (7.2)                |                                                                                                    |
| C14orf79  | 5   | 16  | 0  | 5  | ES+ (2.3, 2.4)                      |                                                                                                    |
| C17orf62  | 18  | 24  | 5  | 0  | ES+ (4), AP- (1)                    |                                                                                                    |
| C17orf81  | 12  | 13  | 1  | 10 | ES- (7.4), PS-                      |                                                                                                    |
| C19orf42  | 13  | 11  | 3  | 6  | ES+ (6)                             | T (8.1), T (2), D (2), D (8.1), t (6)                                                              |
| C5orf24   | 16  | 19  | 1  | 10 | ES+ (4.2)                           |                                                                                                    |
| C5orf45   | 9   | 12  | 2  | 6  | ES- (2.3), ES- (2.2, 2.3)           |                                                                                                    |
| C7orf23   | 26  | 28  | 3  | 11 | AT+ (4.2)                           | t (5), t (4.1)                                                                                     |
| C8orf59   | 31  | 25  | 16 | 9  | ES+ (2.1, 2.2, 2.3), ES+ (2.2, 2.3) |                                                                                                    |
| C9orf25   | 5   | 10  | 1  | 6  | ES- (2.2)                           |                                                                                                    |
| C9orf7    | 6   | 8   | 1  | 0  | ES- (3)                             |                                                                                                    |
| C9orf80   | 14  | 7   | 1  | 0  | ES+ (2)                             |                                                                                                    |
| CAPN7     | 19  | 20  | 0  | 0  | ES+ (3), PS+                        |                                                                                                    |
| CASP6     | 11  | 10  | 1  | 8  | ES+ (4), PS+                        |                                                                                                    |
| CASP8     | 5   | 5   | 1  | 0  | ES+ (10, 11.1)                      |                                                                                                    |
| CBS       | 59  | 42  | 1  | 9  | ES+ (5.2)                           | m (5.2), m (5.2)                                                                                   |
| CCDC115   | 15  | 28  | 1  | 35 | ES- (1.2)                           | o (1.2)                                                                                            |
| CCDC14    | 9   | 6   | 2  | 0  | ES- (2.3)                           |                                                                                                    |
| CCDC58    | 26  | 21  | 2  | 19 | ES+ (2, 3), ES+ (1.2, 2, 3)         | o (3)                                                                                              |
| CCNL2     | 23  | 61  | 2  | 14 | ES- (9, 11), PS+                    | R (4), R (1.1), R (4), R (1.1)                                                                     |
| CCNT1     | 13  | 28  | 0  | 0  | PS-                                 |                                                                                                    |
| CCT7      | 320 | 351 | 2  | 74 | ES+ (3, 4)                          |                                                                                                    |
| CD55      | 15  | 12  | 2  | 12 | ES- (10.1)                          |                                                                                                    |
| CDC25B    | 49  | 34  | 1  | 23 | ES+ (3.1)                           |                                                                                                    |
| CDK1      | 54  | 32  | 4  | 21 | ES+ (5.1)                           | D (2), D (2), A (5.1)                                                                              |
| CDK10     | 15  | 18  | 2  | 3  | ES- (4)                             | B (6), D (5), D (6), D (5)                                                                         |
| CDK2AP2   | 38  | 35  | 2  | 6  | AT+ (3.2)                           |                                                                                                    |
| CDK7      | 29  | 36  | 2  | 5  | ES+ (5.1, 6)                        | D (1), B (2.2), D (1), D (2.2)                                                                     |
| CDV3      | 52  | 52  | 2  | 14 | ES+ (7.2)                           |                                                                                                    |
| CDYL      | 23  | 13  | 2  | 8  | AP+ (5)                             | D (4)                                                                                              |
| CENPM     | 13  | 7   | 3  | 9  | AP- (1)                             |                                                                                                    |
| CENPN     | 7   | 20  | 1  | 11 | ES- (1.2)                           |                                                                                                    |
| CENPN     | 36  | 19  | 0  | 5  | AT+ (13)                            |                                                                                                    |
| CERCAM    | 12  | 9   | 0  | 10 | ES+ (3.3)                           |                                                                                                    |
| CERS5     | 10  | 16  | 0  | 9  | PS+                                 | D (8.2), g (1), T (8.2), N (8.2), t (1), T (15.1), R (1), T (1), R (15.1)                          |
| CHCHD7    | 8   | 18  | 2  | 11 | ES+ (2.1, 2.2)                      |                                                                                                    |
| CHD3      | 42  | 49  | 2  | 33 | ES+ (34)                            | B (32), R (32)                                                                                     |
| CHD8      | 13  | 15  | 1  | 0  | AP- (1)                             |                                                                                                    |
| CHMP1A    | 58  | 75  | 1  | 9  | ES- (5.2)                           |                                                                                                    |
| CHMP2B    | 42  | 41  | 0  | 20 | ES+ (2)                             | o (2)                                                                                              |
| CHTF18    | 16  | 13  | 0  | 4  | PS+                                 |                                                                                                    |
| CHTF8     | 46  | 86  | 3  | 5  | ES- (4)                             |                                                                                                    |
| CHURC1    | 33  | 38  | 4  | 16 | ES+ (3.1, 3.2), ES+ (3.2)           | m (3.2), m (3.2), R (5), R (5), m (3.2), R (3.2), R (3.2), m (5), R (3.2), m (3.2), m (5), R (3.2) |
| CLDND1    | 9   | 10  | 1  | 9  | AP- (1)                             |                                                                                                    |

|         |      |      |    |    |                                |                                                                                                                                                                                                                                                                                                                                                                                                                                                                                                                                                                          |
|---------|------|------|----|----|--------------------------------|--------------------------------------------------------------------------------------------------------------------------------------------------------------------------------------------------------------------------------------------------------------------------------------------------------------------------------------------------------------------------------------------------------------------------------------------------------------------------------------------------------------------------------------------------------------------------|
| CLK1    | 14   | 65   | 6  | 17 | AP- (1), AP+ (7.1)             | D (6.2), D (6.2)                                                                                                                                                                                                                                                                                                                                                                                                                                                                                                                                                         |
| CLK2    | 16   | 35   | 0  | 15 | ES+ (5.2)                      | B (7), D (7), D (6), D (6)                                                                                                                                                                                                                                                                                                                                                                                                                                                                                                                                               |
| CLN3    | 28   | 20   | 1  | 6  | AT+ (14)                       | t (8), t (10.1), t (15), t (8), B (16.1), t (16.1)                                                                                                                                                                                                                                                                                                                                                                                                                                                                                                                       |
| CMAS    | 56   | 60   | 2  | 0  | ES+ (6)                        |                                                                                                                                                                                                                                                                                                                                                                                                                                                                                                                                                                          |
| CNOT2   | 17   | 7    | 1  | 10 | AP- (1.3)                      |                                                                                                                                                                                                                                                                                                                                                                                                                                                                                                                                                                          |
| CNOT8   | 17   | 19   | 0  | 16 | ES+ (6)                        |                                                                                                                                                                                                                                                                                                                                                                                                                                                                                                                                                                          |
| COA5    | 17   | 21   | 2  | 3  | AT+ (3)                        |                                                                                                                                                                                                                                                                                                                                                                                                                                                                                                                                                                          |
| COMMD7  | 26   | 16   | 3  | 2  | ES+ (2.1)                      |                                                                                                                                                                                                                                                                                                                                                                                                                                                                                                                                                                          |
| COX19   | 6    | 17   | 2  | 0  | AT- (13)                       |                                                                                                                                                                                                                                                                                                                                                                                                                                                                                                                                                                          |
| COX7A2  | 156  | 155  | 1  | 3  | AP+ (2.1)                      |                                                                                                                                                                                                                                                                                                                                                                                                                                                                                                                                                                          |
| CPSF4   | 30   | 53   | 8  | 45 | ES- (4), AP+ (2)               | z (3), z (3)                                                                                                                                                                                                                                                                                                                                                                                                                                                                                                                                                             |
| CRB3    | 9    | 14   | 2  | 11 | AT+ (4.2)                      |                                                                                                                                                                                                                                                                                                                                                                                                                                                                                                                                                                          |
| CROT    | 25   | 28   | 4  | 12 | AT+ (5.2)                      | D (15), S (14), B (15), M (20), A (12), B (15), R (20), R (14), D (15), s (15), D (17), B (15), B (17)                                                                                                                                                                                                                                                                                                                                                                                                                                                                   |
| CRYZ    | 17   | 16   | 2  | 13 | ES+ (8)                        | B (8), B (4), R (4), R (8)                                                                                                                                                                                                                                                                                                                                                                                                                                                                                                                                               |
| CSDE1   | 1009 | 1040 | 9  | 94 | ES+ (4)                        | R (4), D (4)                                                                                                                                                                                                                                                                                                                                                                                                                                                                                                                                                             |
| CUTC    | 13   | 6    | 1  | 0  | ES+ (7)                        |                                                                                                                                                                                                                                                                                                                                                                                                                                                                                                                                                                          |
| CYFIP1  | 19   | 11   | 0  | 7  | ES+ (29.2, 30.1)               |                                                                                                                                                                                                                                                                                                                                                                                                                                                                                                                                                                          |
| DCAF4   | 21   | 15   | 1  | 5  | ES- (4.1), ES+ (5, 6)          |                                                                                                                                                                                                                                                                                                                                                                                                                                                                                                                                                                          |
| DDB1    | 130  | 115  | 2  | 70 | AP+ (25.1)                     | R (21), R (3.2), R (21), R (12), R (3.2), R (12)                                                                                                                                                                                                                                                                                                                                                                                                                                                                                                                         |
| DDRGK1  | 14   | 24   | 0  | 0  | AT- (7.3)                      |                                                                                                                                                                                                                                                                                                                                                                                                                                                                                                                                                                          |
| DDX11   | 27   | 14   | 0  | 8  | PS+                            | M (13), R (13), D (3.1)                                                                                                                                                                                                                                                                                                                                                                                                                                                                                                                                                  |
| DDX20   | 8    | 7    | 2  | 0  | ES- (5.2)                      |                                                                                                                                                                                                                                                                                                                                                                                                                                                                                                                                                                          |
| DECR1   | 35   | 42   | 10 | 0  | ES+ (4.1, 4.2), ES+ (4.1), PS+ |                                                                                                                                                                                                                                                                                                                                                                                                                                                                                                                                                                          |
| DIABLO  | 12   | 18   | 2  | 2  | ES- (2.2, 2.3), ES- (2.2)      |                                                                                                                                                                                                                                                                                                                                                                                                                                                                                                                                                                          |
| DNM1L   | 24   | 13   | 1  | 10 | ES- (17, 18)                   | D (16), R (1), R (9), M (1), D (13), D (17), R (1), R (13), r (16), r (18), D (16), R (15), r (16), R (7), D (18), R (15), r (17)                                                                                                                                                                                                                                                                                                                                                                                                                                        |
| DNTTIP2 | 14   | 27   | 1  | 0  | ES+ (3)                        |                                                                                                                                                                                                                                                                                                                                                                                                                                                                                                                                                                          |
| DPAGT1  | 29   | 18   | 1  | 13 | ES- (9.2), AP- (2.2)           | R (2.3), t (4.2), D (6), t (2.3), T (3), R (7), R (3), t (3), M (3), R (9.3), T (9.3), D (2.3), t (9.1), T (7), T (6), T (2.3), R (3), T (2.3), T (7), t (7), t (7), D (7)                                                                                                                                                                                                                                                                                                                                                                                               |
| DPM1    | 100  | 101  | 5  | 73 | ES- (7.1, 7.2)                 |                                                                                                                                                                                                                                                                                                                                                                                                                                                                                                                                                                          |
| DPP7    | 31   | 50   | 1  | 16 | ES+ (1.2), PS-                 |                                                                                                                                                                                                                                                                                                                                                                                                                                                                                                                                                                          |
| DSN1    | 19   | 11   | 2  | 15 | ES+ (3.1, 3.2, 3.3)            |                                                                                                                                                                                                                                                                                                                                                                                                                                                                                                                                                                          |
| DSP     | 86   | 132  | 5  | 41 | ES+ (23.2)                     | o (22), s (23.1), R (23.1)                                                                                                                                                                                                                                                                                                                                                                                                                                                                                                                                               |
| DUSP11  | 11   | 46   | 4  | 8  | AT+ (6)                        | D (4), D (4)                                                                                                                                                                                                                                                                                                                                                                                                                                                                                                                                                             |
| DUT     | 37   | 16   | 3  | 17 | AP- (3.1)                      |                                                                                                                                                                                                                                                                                                                                                                                                                                                                                                                                                                          |
| DYNC1I2 | 34   | 29   | 2  | 11 | ES- (20.1), AP+ (1)            |                                                                                                                                                                                                                                                                                                                                                                                                                                                                                                                                                                          |
| EED     | 10   | 9    | 1  | 9  | AP+ (10.1)                     |                                                                                                                                                                                                                                                                                                                                                                                                                                                                                                                                                                          |
| EIF1AD  | 20   | 30   | 1  | 0  | ES+ (2.1, 2.2), ES+ (2.1)      |                                                                                                                                                                                                                                                                                                                                                                                                                                                                                                                                                                          |
| EIF2B4  | 21   | 30   | 2  | 3  | AP+ (1.3)                      |                                                                                                                                                                                                                                                                                                                                                                                                                                                                                                                                                                          |
| EIF4A2  | 97   | 193  | 12 | 54 | ES+ (4)                        | R (3), M (3), D (3)                                                                                                                                                                                                                                                                                                                                                                                                                                                                                                                                                      |
| EIF5    | 104  | 235  | 9  | 0  | AP+ (3.1)                      |                                                                                                                                                                                                                                                                                                                                                                                                                                                                                                                                                                          |
| EIF5A   | 168  | 159  | 7  | 33 | AT+ (5.2)                      |                                                                                                                                                                                                                                                                                                                                                                                                                                                                                                                                                                          |
| ELK1    | 19   | 16   | 1  | 5  | ES+ (4.2, 5.1, 5.2, 5.3, 6.1)  | D (5.1), D (5.2), D (5.1), r (5.1), r (5.1), D (5.1), R (5.2), r (5.1)                                                                                                                                                                                                                                                                                                                                                                                                                                                                                                   |
| ENY2    | 21   | 19   | 6  | 7  | ES- (5)                        |                                                                                                                                                                                                                                                                                                                                                                                                                                                                                                                                                                          |
| EPN3    | 19   | 39   | 2  | 2  | AP- (1.1)                      | B (2.2), D (2.1), D (2.2), B (2.1), D (2.1), D (2.2), B (2.2), B (2.1), B (2.1), D (2.1)                                                                                                                                                                                                                                                                                                                                                                                                                                                                                 |
| ERBB2IP | 19   | 8    | 1  | 11 | ES- (24.1, 24.2, 24.3)         |                                                                                                                                                                                                                                                                                                                                                                                                                                                                                                                                                                          |
| ERBB3   | 47   | 30   | 6  | 21 | AT+ (5.2)                      | D (4), T (1.2), D (16), D (17.2), D (21), s (7), g (13), s (16), D (17.2), D (9), s (17.2), D (10), D (19.1), s (16), D (8), s (7), g (16), s (17.1), g (5.1), D (6), s (9), s (10), s (9), s (4), s (6), s (8), D (10), s (15), D (20.2), D (16), D (9), s (17.1), g (11), D (15), g (14), s (8), D (15), D (9), D (8), A (23), g (13), D (1.2), D (8), g (17.2), D (7), p (1.1), t (19.1), D (20.2), D (8), D (17.1), s (15), D (7), B (21), s (8), g (9), g (14), s (8), s (15), D (17.1), D (15), D (1.1), D (15), s (17.2), T (19.1), s (10), s (9), s (15), g (15) |
| ESRP1   | 59   | 27   | 0  | 31 | ES+ (15)                       |                                                                                                                                                                                                                                                                                                                                                                                                                                                                                                                                                                          |
| ETFA    | 236  | 189  | 2  | 55 | ES+ (3)                        |                                                                                                                                                                                                                                                                                                                                                                                                                                                                                                                                                                          |
| EXOC1   | 17   | 21   | 1  | 13 | ES- (11)                       |                                                                                                                                                                                                                                                                                                                                                                                                                                                                                                                                                                          |
| EXOC3   | 16   | 19   | 1  | 3  | ES- (10.2)                     |                                                                                                                                                                                                                                                                                                                                                                                                                                                                                                                                                                          |

|         |     |      |    |     |                                               |                                                                                                                                                                                                                                                         |
|---------|-----|------|----|-----|-----------------------------------------------|---------------------------------------------------------------------------------------------------------------------------------------------------------------------------------------------------------------------------------------------------------|
| EXOC5   | 22  | 17   | 0  | 9   | ES+ (4)                                       | o (2)                                                                                                                                                                                                                                                   |
| EXOSC1  | 33  | 41   | 2  | 17  | ES+ (3)                                       | z (3), D (3)                                                                                                                                                                                                                                            |
| EZR     | 97  | 75   | 4  | 0   | AP+ (2.1)                                     |                                                                                                                                                                                                                                                         |
| FAM122B | 38  | 24   | 2  | 10  | AP- (1.1)                                     |                                                                                                                                                                                                                                                         |
| FAM134A | 18  | 17   | 1  | 20  | AP- (1)                                       | t (5), t (2.2), t (1)                                                                                                                                                                                                                                   |
| FAM136A | 65  | 67   | 7  | 22  | ES- (1.3), PS+                                |                                                                                                                                                                                                                                                         |
| FAM185A | 6   | 8    | 1  | 0   | ES- (1.4)                                     |                                                                                                                                                                                                                                                         |
| FAM3A   | 11  | 10   | 1  | 5   | ES- (7.1, 7.2), PS+                           | s (5.3), D (5.3)                                                                                                                                                                                                                                        |
| FAM45A  | 22  | 22   | 0  | 0   | PS+                                           |                                                                                                                                                                                                                                                         |
| FAM73B  | 10  | 13   | 0  | 0   | PS-                                           |                                                                                                                                                                                                                                                         |
| FASTK   | 22  | 31   | 5  | 4   | ES+ (5.9), ES- (5.6)                          |                                                                                                                                                                                                                                                         |
| FBXO25  | 8   | 8    | 1  | 0   | ES- (5)                                       |                                                                                                                                                                                                                                                         |
| FBXW7   | 8   | 15   | 1  | 10  | AP- (1)                                       |                                                                                                                                                                                                                                                         |
| FCHSD1  | 6   | 10   | 2  | 6   | AP- (1)                                       |                                                                                                                                                                                                                                                         |
| FKBP3   | 69  | 61   | 3  | 0   | ES- (3), PS+                                  |                                                                                                                                                                                                                                                         |
| FXDY3   | 46  | 123  | 3  | 8   | ES- (4), AT+ (8.4)                            | T (8.3), D (8.3), t (8.1)                                                                                                                                                                                                                               |
| FZD6    | 18  | 22   | 2  | 2   | AP+ (2.1)                                     | D (6.1), s (5), D (3.4), p (3.3), T (3.3), T (6.1), g (3.4), T (6.1), s (3.4), D (5), D (5), t (6.1), s (3.3), D (6.1), D (3.3), t (6.1), t (6.1), s (5), D (3.3), D (3.3), D (3.3), s (5), t (6.1), T (6.1), D (5), t (6.1), t (6.1), D (6.1), D (3.3) |
| GCA     | 13  | 6    | 2  | 8   | AP- (2)                                       |                                                                                                                                                                                                                                                         |
| GCFC1   | 9   | 15   | 1  | 6   | AT+ (16)                                      |                                                                                                                                                                                                                                                         |
| GCH1    | 18  | 26   | 2  | 0   | ES+ (6.2, 6.3, 6.4, 6.5, 6.6)                 |                                                                                                                                                                                                                                                         |
| GDI2    | 245 | 149  | 2  | 19  | ES+ (7)                                       |                                                                                                                                                                                                                                                         |
| GEMIN2  | 20  | 10   | 0  | 6   | PS+                                           |                                                                                                                                                                                                                                                         |
| GEMIN6  | 16  | 9    | 4  | 12  | ES- (5.1, 5.2)                                |                                                                                                                                                                                                                                                         |
| GLB1    | 26  | 19   | 1  | 10  | AP- (2)                                       | g (4.2), D (1), p (1)                                                                                                                                                                                                                                   |
| GLTP    | 28  | 58   | 1  | 2   | ES- (3.2)                                     |                                                                                                                                                                                                                                                         |
| GMPPA   | 22  | 15   | 1  | 9   | ES- (2.1)                                     |                                                                                                                                                                                                                                                         |
| GNAS    | 990 | 1513 | 3  | 195 | AP+ (1)                                       |                                                                                                                                                                                                                                                         |
| GNB2L1  | 714 | 673  | 21 | 80  | AP+ (7.1)                                     |                                                                                                                                                                                                                                                         |
| GNS     | 55  | 57   | 3  | 12  | AP- (1.1)                                     | D (1.3), D (1.2), m (1.3), D (1.3), m (1.3), p (1.2)                                                                                                                                                                                                    |
| GPATCH4 | 25  | 35   | 0  | 29  | PS-                                           | R (2.2), D (2.2)                                                                                                                                                                                                                                        |
| GPI     | 125 | 121  | 1  | 25  | AP- (1)                                       |                                                                                                                                                                                                                                                         |
| GRB7    | 5   | 14   | 2  | 8   | AP- (1)                                       |                                                                                                                                                                                                                                                         |
| GRHL1   | 11  | 13   | 0  | 5   | PS+                                           | N (1), R (1)                                                                                                                                                                                                                                            |
| GRINL1A | 7   | 9    | 0  | 0   | AP+ (13.1)                                    |                                                                                                                                                                                                                                                         |
| GRK6    | 25  | 13   | 1  | 8   | AT+ (13.2)                                    | R (17.2), I (17.2), R (17.2), I (17.2), I (17.2), D (13.1), R (13.1), R (17.2)                                                                                                                                                                          |
| GSK3B   | 18  | 6    | 1  | 10  | ES- (9)                                       |                                                                                                                                                                                                                                                         |
| GSN     | 37  | 31   | 4  | 0   | AP+ (7)                                       |                                                                                                                                                                                                                                                         |
| GSS     | 30  | 44   | 3  | 6   | AP- (1)                                       | m (5.3), m (5.3), R (5.3), B (5.3)                                                                                                                                                                                                                      |
| GSTT1   | 9   | 20   | 2  | 12  | ES+ (4)                                       |                                                                                                                                                                                                                                                         |
| GUSB    | 30  | 27   | 2  | 6   | ES+ (3.1, 3.2, 4.1, 4.2), ES+ (4.1, 4.2), PS+ | g (3.2)                                                                                                                                                                                                                                                 |
| H2AFY   | 110 | 69   | 1  | 13  | ES+ (7)                                       | D (6.3), r (5), D (3), r (5), R (5), R (3), R (5), D (6.3)                                                                                                                                                                                              |
| H3F3A   | 438 | 221  | 2  | 6   | AT+ (4.2)                                     |                                                                                                                                                                                                                                                         |
| HAGHL   | 10  | 13   | 1  | 7   | ES+ (5.4), PS-                                |                                                                                                                                                                                                                                                         |
| HDLBP   | 57  | 41   | 1  | 2   | AP- (2)                                       | D (11), D (10), D (10), A (11)                                                                                                                                                                                                                          |
| HERC4   | 22  | 13   | 2  | 9   | AP+ (1)                                       | D (28), A (28), D (21), R (21)                                                                                                                                                                                                                          |
| HMBS    | 28  | 14   | 1  | 7   | AT+ (11.2)                                    |                                                                                                                                                                                                                                                         |
| HMGN1   | 294 | 302  | 11 | 90  | AP- (8.1)                                     |                                                                                                                                                                                                                                                         |
| HMOX2   | 26  | 30   | 3  | 0   | AP- (2)                                       |                                                                                                                                                                                                                                                         |
| HN1     | 87  | 89   | 2  | 5   | ES- (2)                                       |                                                                                                                                                                                                                                                         |
| HNRNPA1 | 217 | 129  | 24 | 103 | AT+ (11.5), PS+                               |                                                                                                                                                                                                                                                         |
| HNRNPAB | 267 | 130  | 1  | 20  | ES+ (5.3)                                     |                                                                                                                                                                                                                                                         |
| HNRNPC  | 192 | 94   | 36 | 13  | ES+ (2.2, 2.4), ES+ (2.4)                     |                                                                                                                                                                                                                                                         |
| HNRNPD  | 83  | 27   | 4  | 10  | AT+ (8.2)                                     | D (3), D (3)                                                                                                                                                                                                                                            |
| HNRNPH1 | 154 | 213  | 40 | 137 | ES- (1.4), ES- (2), ES+ (5), PS+              | z (4), D (1.5), D (1.5), D (4), R (10.1), z (10.1), R (6), D (8), z (6), D (8)                                                                                                                                                                          |
| HNRNPL  | 153 | 127  | 2  | 44  | AP- (1)                                       | D (3.2), D (3.2)                                                                                                                                                                                                                                        |
| HNRNPU  | 142 | 97   | 4  | 50  | ES- (1.4)                                     |                                                                                                                                                                                                                                                         |
| HNRPDL  | 52  | 31   | 13 | 29  | ES+ (6), ES- (8), PS+                         | R (6), R (6), R (6), R (6)                                                                                                                                                                                                                              |
| HNRPLL  | 15  | 11   | 1  | 11  | AT+ (6.3)                                     | D (3), z (3), D (9), D (9)                                                                                                                                                                                                                              |
| HRAS    | 23  | 55   | 2  | 9   | ES- (7.2)                                     | D (7.1), I (7.1), R (7.1), B (7.1), R (7.1), M                                                                                                                                                                                                          |

|           |      |      |   |    |                                                      |                                                                                                                                                                                                          |
|-----------|------|------|---|----|------------------------------------------------------|----------------------------------------------------------------------------------------------------------------------------------------------------------------------------------------------------------|
|           |      |      |   |    |                                                      | (7.1), l (7.1), l (7.1), R (7.1), l (7.1)                                                                                                                                                                |
| HSP90AA1  | 1822 | 2264 | 6 | 51 | AT+ (11.2)                                           |                                                                                                                                                                                                          |
| HTATSF1   | 51   | 63   | 1 | 3  | AP- (2.1)                                            | D (10.1), R (10.1)                                                                                                                                                                                       |
| ICMT      | 26   | 19   | 1 | 7  | AT- (3)                                              | t (2), D (5), D (4), t (6), R (4), R (6), t (5), t (4),<br>t (5), t (5), D (6)                                                                                                                           |
| IKBIP     | 5    | 24   | 0 | 9  | ES+ (2)                                              |                                                                                                                                                                                                          |
| IL6ST     | 7    | 8    | 0 | 0  | ES+ (12)                                             |                                                                                                                                                                                                          |
| IMPDH1    | 42   | 38   | 1 | 33 | ES+ (4.2)                                            |                                                                                                                                                                                                          |
| INCENP    | 21   | 10   | 1 | 19 | ES+ (11)                                             |                                                                                                                                                                                                          |
| INF2      | 27   | 29   | 3 | 9  | AP- (1)                                              | B (20), R (8), o (18), R (2), D (8), D (2), D (20)                                                                                                                                                       |
| INO80E    | 10   | 8    | 0 | 0  | ES- (6.1)                                            |                                                                                                                                                                                                          |
| IP6K2     | 14   | 27   | 7 | 17 | ES+ (11.4, 11.5), AT+ (15)                           | R (14)                                                                                                                                                                                                   |
| IRF3      | 33   | 50   | 4 | 2  | AP+ (2.1)                                            | D (6), R (5), R (5), s (6)                                                                                                                                                                               |
| ISG20L2   | 24   | 26   | 0 | 0  | ES+ (1.2)                                            |                                                                                                                                                                                                          |
| IVNS1ABP  | 75   | 33   | 2 | 34 | ES- (9)                                              | D (3), D (3), R (7), D (7), D (7), r (7)                                                                                                                                                                 |
| KAT5      | 15   | 14   | 1 | 10 | ES- (4)                                              |                                                                                                                                                                                                          |
| KBTBD4    | 16   | 19   | 1 | 13 | AP+ (2.1)                                            | D (2.5), D (2.5)                                                                                                                                                                                         |
| KDM2B     | 9    | 10   | 0 | 9  | AP+ (16)                                             |                                                                                                                                                                                                          |
| KDM5B     | 28   | 36   | 1 | 13 | ES- (6)                                              |                                                                                                                                                                                                          |
| KIAA0494  | 26   | 27   | 5 | 17 | ES+ (7)                                              | D (10), D (11), c (11), D (10), M (11), D (11)                                                                                                                                                           |
| KIAA0907  | 13   | 34   | 0 | 4  | PS+                                                  |                                                                                                                                                                                                          |
| KIAA1310  | 13   | 21   | 2 | 7  | ES+ (21.1), ES+ (3.1), AT- (9),<br>PS-               |                                                                                                                                                                                                          |
| KIAA1715  | 6    | 5    | 1 | 0  | ES- (12)                                             |                                                                                                                                                                                                          |
| KIDINS220 | 14   | 14   | 1 | 7  | ES+ (27)                                             | D (18), T (18)                                                                                                                                                                                           |
| KIF23     | 29   | 9    | 1 | 14 | ES+ (9)                                              |                                                                                                                                                                                                          |
| KIFC2     | 12   | 17   | 4 | 9  | ES+ (16.3), PS-                                      | D (11)                                                                                                                                                                                                   |
| KLC1      | 35   | 33   | 2 | 18 | ES- (15), ES+ (14.1), ES+<br>(13.3)                  |                                                                                                                                                                                                          |
| KLHL12    | 21   | 35   | 1 | 21 | AP+ (7.1)                                            | R (10), R (10), D (3), D (5), D (3)                                                                                                                                                                      |
| LDB1      | 21   | 78   | 2 | 30 | AP- (1)                                              |                                                                                                                                                                                                          |
| LETMD1    | 27   | 27   | 3 | 12 | ES+ (2, 3.2), ES+ (3.2), ES+<br>(3.2, 4.1, 4.2), PS+ | s (1.1), R (2), T (5), t (4.1), R (1.1), D (5), D<br>(2), T (1.1), D (1.1)                                                                                                                               |
| LGALS3    | 299  | 224  | 5 | 8  | AT+ (6)                                              | M (7)                                                                                                                                                                                                    |
| LGALS8    | 7    | 8    | 2 | 0  | ES+ (11)                                             |                                                                                                                                                                                                          |
| LMO7      | 10   | 8    | 1 | 9  | ES+ (12)                                             |                                                                                                                                                                                                          |
| LRR1      | 29   | 26   | 2 | 6  | ES- (4, 5), PS+                                      |                                                                                                                                                                                                          |
| LRWD1     | 19   | 23   | 0 | 0  | PS+                                                  |                                                                                                                                                                                                          |
| LSM1      | 34   | 44   | 6 | 37 | ES+ (4)                                              |                                                                                                                                                                                                          |
| LSM14A    | 42   | 24   | 7 | 12 | ES+ (10)                                             |                                                                                                                                                                                                          |
| LYPLA1    | 48   | 29   | 1 | 6  | AT+ (7.3)                                            | D (10), D (10), A (10), A (10)                                                                                                                                                                           |
| LYRM1     | 19   | 11   | 1 | 0  | AP- (1)                                              |                                                                                                                                                                                                          |
| MADD      | 15   | 13   | 2 | 6  | ES- (25.2)                                           |                                                                                                                                                                                                          |
| MAGED2    | 58   | 56   | 5 | 2  | ES- (14.2)                                           |                                                                                                                                                                                                          |
| MAGOH     | 38   | 53   | 6 | 23 | ES+ (3)                                              |                                                                                                                                                                                                          |
| MANBAL    | 14   | 28   | 3 | 0  | AP+ (2.2)                                            |                                                                                                                                                                                                          |
| RBM42     | 39   | 62   | 2 | 30 | ES- (5, 6.1)                                         |                                                                                                                                                                                                          |
| MAP3K3    | 16   | 8    | 1 | 11 | ES- (3)                                              |                                                                                                                                                                                                          |
| MAP7      | 43   | 14   | 1 | 14 | ES+ (9)                                              | o (7)                                                                                                                                                                                                    |
| MAPK9     | 21   | 13   | 0 | 4  | PS+                                                  |                                                                                                                                                                                                          |
| MAPKAPK2  | 47   | 40   | 1 | 16 | ES- (10.1)                                           | R (10.2), R (10.2), D (10.2), M (10.2), R (9)                                                                                                                                                            |
| MARCH7    | 26   | 26   | 0 | 8  | ES+ (12)                                             |                                                                                                                                                                                                          |
| MARK2     | 22   | 13   | 0 | 12 | ES+ (19)                                             |                                                                                                                                                                                                          |
| MAST4     | 22   | 6    | 1 | 0  | AP+ (10)                                             |                                                                                                                                                                                                          |
| MBD1      | 12   | 26   | 1 | 19 | ES+ (18.1)                                           | R (7), z (8), z (13), z (7), R (13), R (8), D (15), r<br>(15)                                                                                                                                            |
| MBIP      | 13   | 18   | 1 | 13 | ES+ (7)                                              | M (4), R (4), R (7), D (7), D (9.2), R (9.2)                                                                                                                                                             |
| MBTPS1    | 47   | 24   | 1 | 0  | AP+ (12.1)                                           |                                                                                                                                                                                                          |
| MCFD2     | 39   | 57   | 1 | 0  | AP- (1)                                              |                                                                                                                                                                                                          |
| MCM7      | 214  | 102  | 4 | 53 | AP+ (2)                                              |                                                                                                                                                                                                          |
| MDH1      | 121  | 92   | 1 | 25 | ES- (7)                                              | B (6), R (6), R (4), B (7), B (6), B (7), R (6), B<br>(6), B (6)                                                                                                                                         |
| MDM2      | 30   | 117  | 6 | 68 | AP- (1)                                              | M (9), z (13.5), R (10), R (13.6), R (2.1), z<br>(12), R (10), R (12), R (8.2), M (13.5), R (2.1),<br>m (9), R (9), R (12), R (12), M (9), R (8.2), D<br>(2.1), D (10), R (10), R (9), M (13.6), S (2.1) |
| MDM4      | 8    | 13   | 1 | 3  | ES+ (11)                                             |                                                                                                                                                                                                          |
| METTL11A  | 36   | 32   | 3 | 21 | ES- (5.2)                                            |                                                                                                                                                                                                          |

|          |     |     |    |    |                                                  |                                                                                                               |
|----------|-----|-----|----|----|--------------------------------------------------|---------------------------------------------------------------------------------------------------------------|
| METTL22  | 6   | 15  | 1  | 0  | ES+ (4)                                          |                                                                                                               |
| MFSD10   | 24  | 39  | 2  | 9  | ES+ (5.1), PS+                                   | t (12.3), t (9), t (10), t (9)                                                                                |
| MGAT4B   | 51  | 81  | 5  | 30 | AP+ (2.1)                                        | D (1), D (1), t (1), T (1)                                                                                    |
| MGEA5    | 30  | 45  | 4  | 32 | AT+ (12.2)                                       | m (11), R (11), s (16), R (14.1), m (14.1), D (16)                                                            |
| MIA3     | 10  | 12  | 1  | 7  | ES+ (15, 16)                                     | g (4.2), g (4.1), o (12.3), T (8.1), D (8.1), D (1), i (6), A (2), D (2), R (6), o (4.1), D (1), p (1), T (1) |
| MICALL2  | 12  | 14  | 0  | 5  | PS+                                              | D (1.1), z (1.1)                                                                                              |
| MMAB     | 15  | 9   | 1  | 11 | ES- (5)                                          |                                                                                                               |
| MMADHC   | 71  | 86  | 1  | 10 | ES- (7)                                          |                                                                                                               |
| MMS19    | 29  | 24  | 1  | 15 | ES+ (17.1)                                       |                                                                                                               |
| MOCS2    | 16  | 13  | 1  | 0  | ES+ (5)                                          |                                                                                                               |
| MORF4L2  | 97  | 110 | 16 | 1  | ES+ (4, 5.1, 5.2), AP- (1), AP+ (3.1), AP+ (6.1) |                                                                                                               |
| MRPL10   | 37  | 64  | 2  | 14 | ES- (2.2)                                        |                                                                                                               |
| MRPL33   | 100 | 150 | 8  | 2  | AT- (8)                                          |                                                                                                               |
| MRPL35   | 23  | 20  | 4  | 12 | ES+ (4.2, 4.3), AT+ (4.4)                        |                                                                                                               |
| MRPL52   | 14  | 22  | 6  | 9  | ES- (1.2), ES+ (4.1), ES+ (3), AP- (1.1)         |                                                                                                               |
| MRPL55   | 13  | 10  | 0  | 1  | ES+ (2.2), ES+ (2.2)                             |                                                                                                               |
| MRPS18C  | 22  | 23  | 9  | 16 | ES+ (3)                                          |                                                                                                               |
| MRPS27   | 37  | 21  | 0  | 15 | ES+ (1.2)                                        | o (12)                                                                                                        |
| MRS2     | 23  | 25  | 1  | 13 | ES+ (3, 4)                                       | B (1), B (11.1), T (1), T (11.1)                                                                              |
| MST4     | 31  | 28  | 5  | 26 | ES+ (8)                                          | D (3), D (3), D (3), B (3)                                                                                    |
| MTA1     | 62  | 45  | 5  | 24 | ES- (4)                                          | D (1), D (1)                                                                                                  |
| MTFR1    | 32  | 14  | 4  | 1  | AP- (2)                                          |                                                                                                               |
| MTHFSD   | 6   | 8   | 1  | 0  | ES- (6)                                          |                                                                                                               |
| MTMR11   | 8   | 5   | 1  | 0  | AP+ (1)                                          |                                                                                                               |
| MTMR14   | 25  | 16  | 0  | 8  | AP+ (4), PS+                                     | g (19)                                                                                                        |
| MTRR     | 9   | 11  | 1  | 0  | AP- (1.2)                                        |                                                                                                               |
| MTSS1L   | 33  | 44  | 2  | 10 | ES+ (7)                                          | o (6)                                                                                                         |
| MYO19    | 17  | 8   | 4  | 10 | AP+ (1.1)                                        |                                                                                                               |
| N4BP2L2  | 11  | 8   | 2  | 8  | AT+ (10)                                         |                                                                                                               |
| NAA25    | 18  | 20  | 1  | 0  | ES- (17), PS+                                    |                                                                                                               |
| NAA30    | 9   | 17  | 0  | 12 | AP- (1)                                          |                                                                                                               |
| NAA60    | 23  | 29  | 1  | 0  | ES- (4)                                          |                                                                                                               |
| NAE1     | 40  | 26  | 4  | 46 | ES- (2)                                          |                                                                                                               |
| NAP1L1   | 144 | 109 | 1  | 17 | ES- (13.3), AT+ (13.6)                           | B (14.1), I (14.1)                                                                                            |
| NASP     | 54  | 9   | 2  | 16 | ES- (4)                                          |                                                                                                               |
| NCBP2    | 63  | 114 | 1  | 6  | ES- (1.2)                                        | D (3.2), D (3.2), B (3.2), R (3.2)                                                                            |
| NCDN     | 15  | 17  | 2  | 5  | ES- (1.2), AP- (1.1)                             |                                                                                                               |
| NCOR1    | 17  | 7   | 1  | 10 | ES- (20.1)                                       |                                                                                                               |
| NCOR2    | 24  | 9   | 1  | 13 | ES- (23.1)                                       |                                                                                                               |
| NFE2L1   | 55  | 84  | 7  | 44 | ES- (5), AP- (1)                                 | D (2)                                                                                                         |
| NKTR     | 12  | 11  | 0  | 8  | PS+                                              | r (15), D (15), R (15), R (15), D (2), R (2)                                                                  |
| NME1     | 122 | 170 | 10 | 4  | AT+ (6.3)                                        |                                                                                                               |
| NME2     | 72  | 89  | 5  | 1  | ES- (8.3)                                        |                                                                                                               |
| NME4     | 97  | 89  | 7  | 16 | AT+ (14)                                         | D (5), B (5)                                                                                                  |
| NOC4L    | 15  | 28  | 1  | 10 | AP+ (10.1)                                       | t (11), t (9), t (12)                                                                                         |
| NR2C2AP  | 27  | 29  | 2  | 14 | ES- (3)                                          |                                                                                                               |
| NT5C3    | 24  | 17  | 1  | 11 | AT+ (10.2)                                       | m (11), B (11)                                                                                                |
| NUB1     | 14  | 18  | 0  | 6  | PS-                                              | D (15), D (14.1), R (14.1), R (13), D (14.1), M (14.1), D (16), M (13), D (13), D (15), R (16)                |
| NUDT16L1 | 17  | 24  | 1  | 11 | ES- (2.2)                                        | D (2.1), R (2.1)                                                                                              |
| NUP160   | 25  | 14  | 3  | 14 | ES- (3.2)                                        |                                                                                                               |
| NUP54    | 25  | 16  | 0  | 16 | ES+ (12), ES+ (6)                                | R (1), m (1)                                                                                                  |
| NUPL1    | 15  | 24  | 8  | 19 | ES+ (5), AT- (19)                                | R (1.1), D (1.1)                                                                                              |
| NXF1     | 16  | 131 | 3  | 0  | ES- (11.2), PS+                                  |                                                                                                               |
| OCIAD1   | 38  | 32  | 1  | 12 | ES+ (3, 4)                                       | R (3), D (3)                                                                                                  |
| OCIAD2   | 24  | 35  | 3  | 8  | ES- (6)                                          | D (2), R (2)                                                                                                  |
| ODF2     | 39  | 25  | 0  | 12 | ES+ (10), ES+ (9.2, 10)                          | o (18)                                                                                                        |
| ORC4     | 13  | 11  | 2  | 2  | ES+ (2.2), AP+ (2.1)                             |                                                                                                               |
| OS9      | 90  | 94  | 1  | 20 | ES- (7.2, 7.3)                                   | g (6)                                                                                                         |
| OSBPL9   | 25  | 14  | 2  | 14 | AP- (4)                                          | D (4), z (4)                                                                                                  |
| P4HA2    | 11  | 20  | 1  | 5  | ES- (2.2)                                        | D (12)                                                                                                        |
| PA2G4    | 181 | 315 | 10 | 0  | AT+ (13.2)                                       |                                                                                                               |
| PABPC1L  | 14  | 10  | 0  | 5  | PS+                                              | D (11), D (1), D (1), D (2), D (4), D (4), R (11),                                                            |

|         |     |     |    |    |                                   | z (2)                                                                                                                                                                                                                                  |
|---------|-----|-----|----|----|-----------------------------------|----------------------------------------------------------------------------------------------------------------------------------------------------------------------------------------------------------------------------------------|
| PABPN1  | 18  | 29  | 12 | 24 | ES- (5.2)                         | D (1.3), R (1.1), o (1.1), D (1.3), R (1.3), M (5.1), R (5.1), R (1.1), R (1.3)                                                                                                                                                        |
| PAPOLA  | 79  | 54  | 5  | 25 | AT+ (7.2), AT- (9.4)              | R (10), r (14), r (14), D (18), B (8), D (15), R (19), D (14), r (21), R (16), r (15), M (18), r (15), A (21), R (16), M (15), S (16), S (16), r (21), D (8), R (13), S (10), D (14), B (9.1), D (15), S (19), S (13), D (9.1), A (21) |
| PARP6   | 23  | 37  | 4  | 3  | ES- (17), ES- (19)                |                                                                                                                                                                                                                                        |
| PDE8A   | 40  | 12  | 0  | 9  | PS+                               | D (9), M (9)                                                                                                                                                                                                                           |
| PDLIM5  | 19  | 5   | 6  | 8  | AT+ (4)                           |                                                                                                                                                                                                                                        |
| PEX5    | 13  | 19  | 1  | 9  | ES+ (9)                           |                                                                                                                                                                                                                                        |
| PFDN1   | 34  | 30  | 2  | 18 | ES+ (2)                           |                                                                                                                                                                                                                                        |
| PFKM    | 19  | 13  | 1  | 8  | ES+ (16.3), ES+ (16.2, 16.3)      | B (16.3), B (16.3), B (16.3)                                                                                                                                                                                                           |
| PHC1    | 5   | 5   | 0  | 0  | AP- (1)                           |                                                                                                                                                                                                                                        |
| PI4KB   | 39  | 59  | 1  | 13 | ES+ (5)                           | D (4)                                                                                                                                                                                                                                  |
| PICALM  | 64  | 40  | 2  | 25 | ES+ (20), ES+ (19, 20)            | R (21), S (21)                                                                                                                                                                                                                         |
| PIGF    | 10  | 9   | 4  | 9  | ES+ (6)                           |                                                                                                                                                                                                                                        |
| PIGT    | 60  | 82  | 2  | 32 | ES+ (2.1, 2.2, 3)                 | D (4), s (4), R (1), g (3), T (1)                                                                                                                                                                                                      |
| PILRB   | 29  | 31  | 2  | 4  | ES+ (10.1, 10.2)                  | D (15), g (14.2), D (13), D (13), T (15), T (13), D (13), t (15)                                                                                                                                                                       |
| PIP5K1A | 34  | 54  | 0  | 24 | ES- (1.2)                         | r (5), D (5), s (5), D (5)                                                                                                                                                                                                             |
| PITRM1  | 80  | 106 | 7  | 2  | AP- (1)                           |                                                                                                                                                                                                                                        |
| PKMYT1  | 26  | 20  | 4  | 5  | AP+ (1)                           |                                                                                                                                                                                                                                        |
| PLA2G15 | 10  | 12  | 0  | 10 | ES+ (5.1)                         | D (6), D (6), A (6), g (6), g (6), A (5.1), A (6), D (5.1), g (6)                                                                                                                                                                      |
| PLD3    | 24  | 29  | 3  | 2  | ES+ (4)                           | g (8.2)                                                                                                                                                                                                                                |
| PLXNB2  | 37  | 42  | 2  | 1  | ES+ (3.2)                         | D (9), g (21), D (19), D (22), D (15), g (15), D (7.1), g (14), D (23), D (4), S (22), D (7.2), D (18), D (18), g (8), g (21), g (21), D (15), D (7.1), g (15), T (23), g (16), D (7.2), D (19), g (20), t (23), T (4)                 |
| PMEPA1  | 40  | 36  | 3  | 15 | AP+ (2.1)                         | D (3), T (3), t (5)                                                                                                                                                                                                                    |
| PMPCA   | 45  | 59  | 4  | 25 | AT+ (6.2)                         |                                                                                                                                                                                                                                        |
| PMPCB   | 56  | 34  | 5  | 24 | ES- (12.2), PS+                   | m (3.1), m (3.1), R (3.1), R (3.1), A (3.1)                                                                                                                                                                                            |
| PNISR   | 16  | 17  | 0  | 0  | PS+                               |                                                                                                                                                                                                                                        |
| PNPO    | 40  | 83  | 3  | 19 | ES+ (4)                           | R (3), B (3)                                                                                                                                                                                                                           |
| PNPT1   | 25  | 12  | 0  | 11 | PS+                               |                                                                                                                                                                                                                                        |
| POFUT2  | 8   | 18  | 1  | 9  | ES- (8.4)                         |                                                                                                                                                                                                                                        |
| POLR2D  | 29  | 43  | 6  | 3  | AP- (1)                           |                                                                                                                                                                                                                                        |
| POLR3D  | 10  | 14  | 0  | 0  | PS+                               |                                                                                                                                                                                                                                        |
| POM121  | 14  | 26  | 1  | 18 | AP- (1)                           | R (5), t (5), D (5), D (5), R (5), R (5), R (5)                                                                                                                                                                                        |
| PPIL2   | 14  | 10  | 1  | 0  | ES+ (22.3)                        |                                                                                                                                                                                                                                        |
| PPIL3   | 10  | 8   | 1  | 9  | ES- (1.3)                         |                                                                                                                                                                                                                                        |
| PPP1R7  | 12  | 16  | 1  | 15 | ES+ (2)                           | z (11), D (11)                                                                                                                                                                                                                         |
| PPP2R5C | 31  | 11  | 5  | 9  | AT+ (3)                           | M (19)                                                                                                                                                                                                                                 |
| PQBP1   | 35  | 25  | 2  | 9  | AT+ (4)                           | R (6), R (6), R (6), R (6), D (3), o (5), D (3), R (6), R (6)                                                                                                                                                                          |
| PRDX2   | 209 | 311 | 1  | 6  | AT- (3.2)                         |                                                                                                                                                                                                                                        |
| PREB    | 42  | 44  | 1  | 9  | ES- (6)                           | T (1.3), D (1.3)                                                                                                                                                                                                                       |
| PREPL   | 13  | 17  | 2  | 1  | AT+ (15.2)                        |                                                                                                                                                                                                                                        |
| PRMT1   | 111 | 120 | 1  | 7  | ES- (11.2)                        |                                                                                                                                                                                                                                        |
| PROM2   | 25  | 42  | 0  | 7  | PS+                               | D (12), T (12)                                                                                                                                                                                                                         |
| PROSER1 | 26  | 28  | 1  | 15 | ES+ (2)                           |                                                                                                                                                                                                                                        |
| PRPF3   | 38  | 66  | 2  | 31 | ES- (4)                           | D (2), M (2)                                                                                                                                                                                                                           |
| PRPF38B | 26  | 33  | 3  | 22 | ES- (2)                           | o (8)                                                                                                                                                                                                                                  |
| PRRC2C  | 44  | 26  | 0  | 34 | ES- (34)                          |                                                                                                                                                                                                                                        |
| PRUNE   | 20  | 14  | 3  | 25 | ES+ (4), ES+ (4, 5.2, 6), AP- (1) | R (6), m (3), R (4), m (4), R (3), R (4), B (4), M (4), m (6), m (4), R (3), m (3)                                                                                                                                                     |
| PSMA1   | 73  | 99  | 1  | 14 | ME+ (8.2, 9)                      |                                                                                                                                                                                                                                        |
| PSMD13  | 49  | 77  | 2  | 23 | ES- (3.2)                         | D (8)                                                                                                                                                                                                                                  |
| PTGES3  | 413 | 233 | 6  | 53 | ES+ (6)                           | D (2), D (2)                                                                                                                                                                                                                           |
| PTPMT1  | 39  | 35  | 0  | 7  | ES- (1.2)                         |                                                                                                                                                                                                                                        |
| PTPRF   | 65  | 27  | 2  | 4  | ES+ (12)                          | m (13), R (12), D (12), T (3.2), D (13), D (3.2)                                                                                                                                                                                       |
| PTTG1   | 47  | 41  | 2  | 0  | AP+ (2.1)                         |                                                                                                                                                                                                                                        |
| RAB1A   | 107 | 99  | 4  | 21 | ES+ (6, 7)                        | R (6), R (7)                                                                                                                                                                                                                           |
| RAB5C   | 82  | 103 | 4  | 0  | ES- (2)                           |                                                                                                                                                                                                                                        |
| RABL5   | 21  | 19  | 0  | 9  | PS-                               | R (4), R (1)                                                                                                                                                                                                                           |

|          |      |      |      |     |                                      |                                                                                                                                                                                    |
|----------|------|------|------|-----|--------------------------------------|------------------------------------------------------------------------------------------------------------------------------------------------------------------------------------|
| RAD1     | 11   | 7    | 4    | 0   | ES+ (7)                              |                                                                                                                                                                                    |
| RAD17    | 11   | 9    | 0    | 10  | ES+ (5)                              |                                                                                                                                                                                    |
| RAD21    | 159  | 97   | 1    | 45  | AP+ (12.1)                           | z (6), R (8), S (9), R (8), S (8), S (11.2), R (9), D (8), z (11.2), S (6)                                                                                                         |
| RAD51C   | 68   | 54   | 15   | 17  | ES+ (7), AT- (10)                    | M (10)                                                                                                                                                                             |
| RAE1     | 66   | 105  | 1    | 4   | AT+ (12.2)                           |                                                                                                                                                                                    |
| RALGAPB  | 13   | 18   | 3    | 8   | ES+ (25.1)                           | D (23), D (23)                                                                                                                                                                     |
| RANBP2   | 24   | 23   | 4    | 16  | ES+ (20.1)                           | D (20.1), N (20.1), M (20.1), D (20.1), S (20.1), z (20.1), A (20.1), M (20.1), R (20.1), z (20.1), D (20.1) |
| RANGAP1  | 31   | 36   | 3    | 1   | AP+ (6.1)                            |                                                                                                                                                                                    |
| RBBP6    | 17   | 34   | 1    | 18  | ES+ (16)                             | z (8), R (17), R (8), z (6), S (18), R (6), R (18), R (17)                                                                                                                         |
| RBL2     | 23   | 13   | 1    | 22  | AP+ (6)                              |                                                                                                                                                                                    |
| RBM3     | 73   | 98   | 3    | 17  | ES- (5.2), AP+ (2.1)                 | D (2.2), D (2.2)                                                                                                                                                                   |
| RBM39    | 62   | 89   | 5    | 37  | ES- (4)                              | D (13), z (16), R (17), D (13), R (17), R (16)                                                                                                                                     |
| RBMX     | 111  | 39   | 0    | 24  | PS+                                  | D (2), D (2)                                                                                                                                                                       |
| RC3H1    | 6    | 9    | 2    | 0   | ES+ (20.1)                           |                                                                                                                                                                                    |
| RCC1     | 64   | 46   | 1    | 36  | ES- (7)                              |                                                                                                                                                                                    |
| RCCD1    | 15   | 7    | 1    | 10  | AP+ (1)                              |                                                                                                                                                                                    |
| REPIN1   | 43   | 34   | 2    | 27  | ES+ (4.2), AP- (5.1)                 |                                                                                                                                                                                    |
| REPS1    | 13   | 9    | 1    | 10  | ES+ (12.2, 12.3, 13), ES+ (12.3, 13) |                                                                                                                                                                                    |
| RETSAT   | 12   | 121  | 0    | 7   | PS+                                  | M (2)                                                                                                                                                                              |
| RFC5     | 31   | 27   | 2    | 7   | ES+ (2.2)                            |                                                                                                                                                                                    |
| RFWD2    | 22   | 5    | 1    | 8   | ES+ (9)                              |                                                                                                                                                                                    |
| RHBDD2   | 46   | 146  | 4    | 29  | ES+ (2)                              | t (3), t (3), t (1)                                                                                                                                                                |
| RIF1     | 15   | 9    | 2    | 11  | ES+ (31)                             |                                                                                                                                                                                    |
| RINT1    | 30   | 40   | 5    | 0   | ES- (3)                              |                                                                                                                                                                                    |
| RPAIN    | 9    | 10   | 2    | 9   | ES+ (6.1)                            |                                                                                                                                                                                    |
| RPE      | 29   | 18   | 0    | 11  | ES- (8)                              | m (1.1), R (10.2), A (1.1), m (1.1), B (1.1), R (1.1), R (1.1)                                                                                                                     |
| RPL14    | 378  | 413  | 4    | 5   | ES- (1.2, 1.3)                       |                                                                                                                                                                                    |
| RPL21    | 662  | 961  | 1    | 0   | ES- (1.4)                            |                                                                                                                                                                                    |
| RPL22L1  | 45   | 28   | 9    | 7   | ES- (3.1), PS+                       |                                                                                                                                                                                    |
| RPL34    | 306  | 447  | 12   | 0   | AT- (8)                              |                                                                                                                                                                                    |
| RPL7     | 780  | 931  | 5    | 4   | AT+ (7.2)                            |                                                                                                                                                                                    |
| RPLP0    | 1904 | 2924 | 57   | 557 | AP+ (6.1)                            |                                                                                                                                                                                    |
| RPS10    | 983  | 1480 | 1    | 14  | ES+ (6)                              |                                                                                                                                                                                    |
| RPS19BP1 | 37   | 42   | 2    | 0   | ES- (3)                              |                                                                                                                                                                                    |
| RPS21    | 889  | 692  | 397  | 15  | AT+ (3.11)                           |                                                                                                                                                                                    |
| RPS23    | 169  | 263  | 1    | 0   | ES- (3.3)                            |                                                                                                                                                                                    |
| RPS27L   | 24   | 82   | 8    | 13  | AT+ (5.2)                            |                                                                                                                                                                                    |
| RPS29    | 1510 | 462  | 1080 | 22  | AT+ (3), AT+ (4)                     |                                                                                                                                                                                    |
| RPS6KA4  | 17   | 20   | 0    | 4   | PS-                                  |                                                                                                                                                                                    |
| RUNX1    | 10   | 5    | 1    | 6   | ES+ (8)                              |                                                                                                                                                                                    |
| RWDD4    | 14   | 13   | 3    | 5   | ES+ (3.1)                            | D (2), R (2)                                                                                                                                                                       |
| S100A14  | 135  | 145  | 2    | 0   | AP+ (3)                              |                                                                                                                                                                                    |
| SAE1     | 98   | 73   | 0    | 5   | ES+ (4)                              |                                                                                                                                                                                    |
| SAP30BP  | 38   | 48   | 2    | 7   | ES+ (3)                              |                                                                                                                                                                                    |
| SAT2     | 6    | 28   | 1    | 10  | ES- (1.2)                            |                                                                                                                                                                                    |
| SBF1     | 11   | 19   | 1    | 14  | ES+ (29)                             |                                                                                                                                                                                    |
| SCAF4    | 9    | 13   | 2    | 10  | ES+ (3)                              |                                                                                                                                                                                    |
| SCAND1   | 13   | 23   | 5    | 0   | ES- (3.2)                            |                                                                                                                                                                                    |
| SCARB1   | 50   | 24   | 1    | 7   | AT+ (13.4)                           | T (1), D (13.2), D (1), g (5), T (13.2), g (5), t (13.2), t (1)                                                                                                                    |
| SDCBP    | 16   | 46   | 1    | 8   | ES- (3.2)                            | D (6.2), z (6.2)                                                                                                                                                                   |
| SEC14L1  | 12   | 12   | 4    | 0   | AP+ (1), PS-                         |                                                                                                                                                                                    |
| SEC16A   | 34   | 29   | 6    | 15  | AT+ (27.3)                           | R (1.3), R (23.3), R (1.3), R (23.3)                                                                                                                                               |
| SEMA3B   | 13   | 17   | 0    | 0   | PS-                                  |                                                                                                                                                                                    |
| SENP6    | 18   | 19   | 1    | 6   | ES+ (8)                              | A (22), A (21), p (22), A (25), R (18.1), p (25), R (18.1), p (21)                                                                                                                 |
| SEPT2    | 51   | 34   | 2    | 8   | ES- (8)                              |                                                                                                                                                                                    |
| SERF2    | 45   | 40   | 29   | 1   | ES+ (3.3, 3.4), AT+ (7.2)            |                                                                                                                                                                                    |
| SETD8    | 30   | 28   | 0    | 0   | PS-                                  |                                                                                                                                                                                    |
| SF3B1    | 78   | 73   | 3    | 15  | ES- (4.2, 4.3)                       | D (12), D (7), R (7), R (12)                                                                                                                                                       |
| SFSWAP   | 16   | 13   | 0    | 6   | ES+ (2.2), PS+                       |                                                                                                                                                                                    |



|          |     |     |    |     |                               |                                                                                                                                                                                                                                                                    |
|----------|-----|-----|----|-----|-------------------------------|--------------------------------------------------------------------------------------------------------------------------------------------------------------------------------------------------------------------------------------------------------------------|
| SFXN4    | 23  | 12  | 2  | 5   | AP- (1)                       |                                                                                                                                                                                                                                                                    |
| SH3GL1   | 33  | 23  | 0  | 5   | ES+ (4)                       | D (2), M (2), R (3), s (3)                                                                                                                                                                                                                                         |
| SH3YL1   | 11  | 12  | 6  | 4   | ES+ (19)                      | D (20), A (20)                                                                                                                                                                                                                                                     |
| SHARPIN  | 15  | 20  | 0  | 0   | PS-                           |                                                                                                                                                                                                                                                                    |
| SHC1     | 22  | 77  | 12 | 38  | AP- (1), AP+ (2.1)            | D (12), D (12)                                                                                                                                                                                                                                                     |
| SHFM1    | 171 | 92  | 4  | 4   | AT+ (4.2), AT+ (7)            |                                                                                                                                                                                                                                                                    |
| SHMT1    | 23  | 8   | 0  | 12  | ES+ (12)                      |                                                                                                                                                                                                                                                                    |
| SIDT2    | 13  | 21  | 2  | 12  | ES+ (11)                      | D (1.1), t (25.1), g (20), g (4), g (18), D (22), g (21), T (19), T (1.1), D (22), g (1.2), t (19), D (9), D (25.3), g (3), T (22), t (22), g (1.2), D (20), g (3), T (25.3), D (19), T (9), t (16), T (22), t (9), t (20), D (17), g (18), T (20), T (17), t (21) |
| SKA3     | 20  | 10  | 0  | 3   | PS+                           |                                                                                                                                                                                                                                                                    |
| SLC1A5   | 115 | 87  | 1  | 8   | AP- (2)                       | g (5), t (6)                                                                                                                                                                                                                                                       |
| SLC20A1  | 41  | 37  | 2  | 16  | AP+ (6.1)                     | t (5), t (3), D (3), D (4), t (2), T (4), T (2), T (2), D (2), T (2), D (2), t (2), D (2), t (2), T (3)                                                                                                                                                            |
| SLC25A15 | 22  | 21  | 0  | 14  | PS-                           | t (3.3), t (3.3)                                                                                                                                                                                                                                                   |
| SLC25A25 | 10  | 31  | 9  | 27  | AP- (1), AP+ (3.1)            | D (5), c (5), D (3.1), D (5), D (6), T (3.1), D (6), D (3.1), D (5), D (3.1)                                                                                                                                                                                       |
| SLC25A29 | 23  | 15  | 2  | 3   | ES+ (3.2, 3.3, 3.4, 3.5)      | t (1), t (4), t (1), t (4)                                                                                                                                                                                                                                         |
| SLC25A3  | 253 | 347 | 3  | 31  | ES- (2.2), AT+ (4.2)          | t (6), t (8), T (5), T (7), B (5), D (8), R (6), T (6), D (4.1), t (6), D (6), T (8), B (7), T (4.1), t (5), t (5), M (8), t (6)                                                                                                                                   |
| SLC26A6  | 7   | 9   | 1  | 0   | AP- (2.1)                     |                                                                                                                                                                                                                                                                    |
| SLC2A8   | 11  | 38  | 1  | 11  | ES- (5)                       | M (1), D (6), D (3), T (4), T (2), t (3), t (2), D (1), t (6), R (4), t (3), D (4), t (2), T (3), t (5), M (5), D (5), t (3), t (3), T (3), t (2), T (5), D (3), D (1), D (2), T (1), t (4), t (2), D (5), T (5)                                                   |
| SLC30A6  | 17  | 11  | 1  | 13  | ES- (5)                       | t (10), D (8), T (1), t (8), T (3), t (4), T (6), t (3), T (10), T (13), T (8), D (3), D (6), D (10), D (1), D (13)                                                                                                                                                |
| SLC35A2  | 13  | 28  | 1  | 10  | ES- (5.1)                     | t (5.1), t (5.1), t (4.1), t (5.1), t (5.1), t (5.1)                                                                                                                                                                                                               |
| SLC35C2  | 23  | 18  | 1  | 13  | ES+ (8.1)                     | t (3.5), t (4), g (5), t (6), t (5)                                                                                                                                                                                                                                |
| SLC35E2B | 10  | 8   | 1  | 0   | ES- (2)                       |                                                                                                                                                                                                                                                                    |
| SLC35F5  | 19  | 14  | 2  | 7   | AT+ (7.2)                     | D (8), t (9), t (7.1), t (13), t (12), t (8), t (14), t (10), t (11)                                                                                                                                                                                               |
| SLC38A1  | 94  | 28  | 1  | 1   | ES- (1.2, 3), ES- (3)         | t (18)                                                                                                                                                                                                                                                             |
| SLC38A2  | 118 | 64  | 4  | 19  | ES+ (4), PS+                  | t (4), t (6), t (4)                                                                                                                                                                                                                                                |
| SLC3A2   | 108 | 288 | 19 | 98  | ES+ (2, 3, 4.1, 4.2), AP- (1) | D (5.2), T (5.2), g (9), D (5.3), g (10), g (10), t (5.3)                                                                                                                                                                                                          |
| SLC6A6   | 17  | 7   | 2  | 9   | AT+ (6.2)                     |                                                                                                                                                                                                                                                                    |
| SLCO4A1  | 8   | 5   | 1  | 0   | AP- (1)                       |                                                                                                                                                                                                                                                                    |
| SLMO2    | 146 | 206 | 16 | 57  | ES+ (3.2), ES+ (3.1, 3.2)     | R (1), D (1)                                                                                                                                                                                                                                                       |
| SMARCA4  | 51  | 19  | 1  | 20  | ES- (36.1)                    |                                                                                                                                                                                                                                                                    |
| SMARCB1  | 48  | 37  | 4  | 21  | ES+ (2.2)                     | S (3), R (3)                                                                                                                                                                                                                                                       |
| SMARCD1  | 26  | 34  | 2  | 16  | ES+ (12)                      | R (5), R (4), R (4), R (5), o (11)                                                                                                                                                                                                                                 |
| SMARCD2  | 164 | 148 | 2  | 183 | AP+ (1.2)                     |                                                                                                                                                                                                                                                                    |
| SMC6     | 16  | 8   | 1  | 10  | ES- (9)                       |                                                                                                                                                                                                                                                                    |
| SMEK2    | 28  | 17  | 3  | 18  | ES+ (12)                      |                                                                                                                                                                                                                                                                    |
| SNRNP40  | 29  | 17  | 2  | 13  | ES- (10)                      |                                                                                                                                                                                                                                                                    |
| SNRNP70  | 40  | 52  | 1  | 12  | ES+ (8.1, 8.2)                | D (5), D (5)                                                                                                                                                                                                                                                       |
| SNRPB    | 76  | 66  | 2  | 9   | AT+ (7.4)                     | S (6), R (6)                                                                                                                                                                                                                                                       |
| SNRPG    | 87  | 60  | 5  | 6   | AP+ (2.1), AP+ (2.2)          |                                                                                                                                                                                                                                                                    |
| SPDEF    | 86  | 53  | 1  | 16  | ES+ (4)                       |                                                                                                                                                                                                                                                                    |
| SQSTM1   | 38  | 92  | 8  | 3   | AP- (1), AP+ (5.1)            | R (3), S (3), R (3), R (3), D (3), R (3), D (3), R (3)                                                                                                                                                                                                             |
| SRPK2    | 50  | 8   | 2  | 13  | AP+ (1)                       |                                                                                                                                                                                                                                                                    |
| SRSF11   | 33  | 36  | 1  | 4   | AP- (1)                       |                                                                                                                                                                                                                                                                    |
| SRSF2    | 129 | 131 | 14 | 0   | ES+ (2.7), ES- (2.4), PS+     |                                                                                                                                                                                                                                                                    |
| SRSF3    | 124 | 77  | 8  | 33  | ES- (4.1), AT+ (4.2)          | R (5), D (5)                                                                                                                                                                                                                                                       |
| SRSF7    | 63  | 54  | 10 | 30  | ES- (4.3, 4.4), PS+           | D (3), R (4.6), D (3), r (4.6)                                                                                                                                                                                                                                     |
| SS18L1   | 15  | 24  | 0  | 7   | PS-                           | R (1), R (1)                                                                                                                                                                                                                                                       |
| SSFA2    | 16  | 11  | 2  | 2   | AP- (1)                       |                                                                                                                                                                                                                                                                    |
| SSH3     | 38  | 31  | 2  | 0   | ES+ (4.2)                     |                                                                                                                                                                                                                                                                    |
| SSU72    | 18  | 8   | 2  | 12  | AT+ (2.2)                     |                                                                                                                                                                                                                                                                    |
| STAG2    | 43  | 19  | 2  | 7   | AP+ (2), AP+ (4.1)            |                                                                                                                                                                                                                                                                    |
| STAG3L2  | 5   | 5   | 1  | 0   | ES+ (6)                       |                                                                                                                                                                                                                                                                    |
| STIP1    | 229 | 162 | 1  | 14  | AT+ (6.2)                     |                                                                                                                                                                                                                                                                    |

|          |     |     |    |    |                                  |                                                                                                             |
|----------|-----|-----|----|----|----------------------------------|-------------------------------------------------------------------------------------------------------------|
| STRAP    | 108 | 132 | 3  | 34 | ES+ (3)                          |                                                                                                             |
| STX10    | 21  | 19  | 4  | 11 | ES- (7.2)                        | t (7.3), D (7.3)                                                                                            |
| STX16    | 59  | 106 | 6  | 51 | ES- (7.1, 7.2)                   | D (1.5), T (1.5)                                                                                            |
| STX18    | 10  | 5   | 1  | 7  | AP+ (2)                          |                                                                                                             |
| SUGP1    | 11  | 11  | 3  | 1  | AT+ (16)                         | R (14), D (14), M (10)                                                                                      |
| SULF2    | 92  | 117 | 17 | 81 | ES+ (20)                         |                                                                                                             |
| SUPT5H   | 41  | 81  | 2  | 18 | AP- (1)                          |                                                                                                             |
| SUPT7L   | 10  | 17  | 1  | 3  | ES+ (2.3), ES+ (2.3, 2.4)        |                                                                                                             |
| SYF2     | 16  | 34  | 1  | 13 | ES+ (3)                          | o (3)                                                                                                       |
| SYPL1    | 147 | 152 | 3  | 35 | ES- (6)                          | D (7), D (2.2), T (7), D (2.2), t (5)                                                                       |
| SYTL1    | 9   | 34  | 1  | 3  | ES- (8.8)                        |                                                                                                             |
| SYTL2    | 59  | 34  | 8  | 35 | ES+ (11.2)                       | D (2), D (2)                                                                                                |
| TAF1D    | 15  | 22  | 0  | 0  | PS+                              |                                                                                                             |
| TAF2     | 18  | 11  | 0  | 0  | PS-                              |                                                                                                             |
| TAF6     | 42  | 41  | 4  | 24 | ES- (3)                          |                                                                                                             |
| TARBP2   | 22  | 31  | 1  | 5  | ES- (7.1)                        | D (3.2), R (3.2), S (3.2), R (3.2)                                                                          |
| TBC1D14  | 14  | 21  | 1  | 16 | AP+ (6)                          | D (10), R (10)                                                                                              |
| TBC1D7   | 21  | 19  | 1  | 11 | ES+ (5)                          | R (3), D (3)                                                                                                |
| TCEB1    | 24  | 33  | 1  | 2  | AP- (1.2)                        |                                                                                                             |
| TCOF1    | 29  | 15  | 2  | 19 | ES+ (7)                          |                                                                                                             |
| TCTN3    | 19  | 15  | 2  | 15 | ES+ (8)                          | T (14), t (14), D (1), D (14), T (1)                                                                        |
| TFAM     | 21  | 28  | 2  | 8  | ES+ (5)                          | R (5), N (5)                                                                                                |
| TFDP1    | 44  | 26  | 1  | 5  | AP+ (1)                          |                                                                                                             |
| THAP5    | 21  | 15  | 2  | 8  | AP- (1)                          | D (4), D (1), o (4), z (1)                                                                                  |
| THOC3    | 85  | 96  | 3  | 6  | AT+ (6.2)                        |                                                                                                             |
| TIA1     | 17  | 11  | 2  | 11 | ES- (8), AT+ (9.2)               | D (11), z (7), D (11), D (7)                                                                                |
| TIAL1    | 39  | 55  | 5  | 28 | AT+ (5.2)                        | D (5.1), D (9), z (5.1), D (9)                                                                              |
| TIMM50   | 22  | 26  | 0  | 0  | PS+                              |                                                                                                             |
| TIPIN    | 15  | 5   | 1  | 0  | ES+ (4)                          |                                                                                                             |
| TJP1     | 18  | 10  | 4  | 13 | ES+ (23), ES- (30.2)             | D (29), D (29)                                                                                              |
| TLE2     | 11  | 10  | 1  | 8  | ES- (9.2), PS+                   | M (11), R (11), D (11)                                                                                      |
| TM2D3    | 12  | 22  | 1  | 6  | AP+ (2.1)                        | t (4), D (1.1), p (1.1), t (5)                                                                              |
| TMBIM4   | 15  | 9   | 1  | 9  | AP+ (2.1)                        |                                                                                                             |
| TMED2    | 172 | 164 | 9  | 55 | AP+ (2.1)                        | T (1.1), D (1.1), D (1.2), R (1.2), R (1.1), R (1.1), p (1.1)                                               |
| TMEM126B | 18  | 21  | 1  | 12 | ES+ (2.1), ES+ (2.1, 2.2, 4)     | t (6.1), t (5.1), t (5.2), t (6.3)                                                                          |
| TMEM134  | 16  | 40  | 2  | 11 | ES- (2.2)                        | T (8), t (7), D (1), D (8), T (1), t (4.1)                                                                  |
| TMEM59   | 71  | 80  | 2  | 10 | AP- (1.1)                        | T (1.2), g (2.2), D (1.2), D (1.2), p (1.2)                                                                 |
| TMEM63A  | 11  | 10  | 1  | 4  | AP+ (9.1)                        | t (21), g (16), t (22), g (3), t (3), t (20), t (16), t (7), t (9.2), t (23), t (17), t (18), t (21)        |
| TMEM70   | 13  | 14  | 5  | 9  | ES- (3), PS+                     | t (2.1), t (4)                                                                                              |
| TMEM93   | 33  | 43  | 3  | 0  | ES- (1.2)                        |                                                                                                             |
| TMPO     | 65  | 26  | 19 | 37 | ES+ (6, 7, 8), AT+ (4), AT- (10) | M (4), o (4)                                                                                                |
| TMUB2    | 15  | 17  | 2  | 12 | ES+ (3, 4.1), ES+ (3)            |                                                                                                             |
| TNFRSF1A | 37  | 27  | 1  | 7  | AT+ (6)                          | D (7), D (8), D (2), M (11), T (8), s (7), R (10), s (5.1), R (10), D (5.1), t (8), T (2), D (11)           |
| TOR2A    | 6   | 16  | 1  | 5  | ES- (2)                          |                                                                                                             |
| TPM1     | 68  | 47  | 2  | 20 | ES- (12.2)                       | D (3.2), r (3.2)                                                                                            |
| TPX2     | 97  | 33  | 1  | 7  | ES- (11)                         |                                                                                                             |
| TRAPPC6B | 22  | 27  | 0  | 9  | PS+                              |                                                                                                             |
| TRIM11   | 8   | 19  | 1  | 11 | AT- (5.2)                        |                                                                                                             |
| TRIP12   | 35  | 24  | 0  | 19 | ES+ (19.1)                       | D (18), D (18)                                                                                              |
| TSC22D1  | 18  | 33  | 3  | 10 | AP- (1.1)                        |                                                                                                             |
| TSEN15   | 25  | 10  | 2  | 9  | ES+ (5.1, 5.2)                   |                                                                                                             |
| TSPAN31  | 15  | 16  | 3  | 8  | AT+ (6.2)                        | T (2.2), T (2.1), g (3), t (1), g (5.2), g (5.2), t (2.2), D (2.1), D (2.2), t (2.1), g (5.2), T (3), D (3) |
| TTC31    | 10  | 11  | 0  | 3  | PS-                              |                                                                                                             |
| TTI1     | 21  | 11  | 1  | 0  | ES+ (2)                          |                                                                                                             |
| TTYH3    | 8   | 22  | 1  | 11 | AP- (1)                          |                                                                                                             |
| TUFT1    | 15  | 48  | 2  | 17 | ES+ (3)                          | o (5)                                                                                                       |
| TYMS     | 61  | 100 | 2  | 17 | ES+ (4)                          |                                                                                                             |
| UBB      | 471 | 612 | 0  | 5  | ES- (2.2)                        |                                                                                                             |
| UBE2A    | 41  | 69  | 10 | 44 | ES+ (4.2)                        |                                                                                                             |
| UBE2B    | 22  | 27  | 1  | 0  | ES+ (3, 4)                       |                                                                                                             |
| UBE2C    | 49  | 33  | 0  | 6  | ES- (3.2)                        |                                                                                                             |
| UBE2G2   | 28  | 44  | 0  | 14 | PS-                              |                                                                                                             |

|         |     |     |    |    |                           |                                                                                                                                                           |
|---------|-----|-----|----|----|---------------------------|-----------------------------------------------------------------------------------------------------------------------------------------------------------|
| UBTF    | 33  | 28  | 1  | 5  | AP+ (5.1)                 | R (10), N (10)                                                                                                                                            |
| UBXN1   | 38  | 62  | 2  | 26 | ES- (8.2)                 | R (3), R (3), B (7), D (7)                                                                                                                                |
| UBXN2A  | 5   | 5   | 1  | 0  | AP- (3)                   |                                                                                                                                                           |
| UEVLD   | 11  | 8   | 1  | 9  | ES- (3)                   |                                                                                                                                                           |
| UGDH    | 171 | 55  | 2  | 26 | ES+ (4)                   | R (4), R (4), R (4), B (4), R (6), R (6), B (4)                                                                                                           |
| UMPS    | 34  | 36  | 3  | 19 | ES+ (3)                   | D (1), R (1), R (4.2), R (4.2)                                                                                                                            |
| UQCC    | 5   | 5   | 0  | 0  | ES- (2)                   |                                                                                                                                                           |
| USMG5   | 87  | 111 | 1  | 0  | ME- (2.2, 3)              |                                                                                                                                                           |
| USP15   | 18  | 21  | 0  | 8  | AP- (4)                   | D (1), A (10), A (22), D (1)                                                                                                                              |
| USP16   | 14  | 12  | 2  | 10 | ES+ (8.1)                 |                                                                                                                                                           |
| USP8    | 41  | 32  | 6  | 22 | ES+ (4), ES+ (13)         |                                                                                                                                                           |
| VEGFA   | 14  | 19  | 2  | 13 | ES+ (7.1, 7.2, 8.1, 8.2)  | D (1), p (1)                                                                                                                                              |
| VMP1    | 246 | 218 | 16 | 21 | ES+ (4)                   | T (2), t (4), t (3), D (3), T (4), T (3), D (4), D (2)                                                                                                    |
| VTI1B   | 40  | 39  | 1  | 0  | ES+ (2, 3)                |                                                                                                                                                           |
| WARS    | 57  | 49  | 2  | 28 | ES+ (5)                   | D (5), R (5)                                                                                                                                              |
| WBSCR22 | 63  | 49  | 6  | 9  | AT+ (10.2)                |                                                                                                                                                           |
| WDR37   | 11  | 10  | 0  | 5  | AP- (3)                   |                                                                                                                                                           |
| WDR6    | 36  | 43  | 5  | 13 | ES- (5.6), PS+            |                                                                                                                                                           |
| WIPI1   | 9   | 10  | 2  | 10 | ES+ (2)                   |                                                                                                                                                           |
| WIPI2   | 16  | 19  | 2  | 10 | ES+ (12.2)                |                                                                                                                                                           |
| XRCC3   | 18  | 23  | 5  | 0  | AP- (1.1), AP+ (3.1)      |                                                                                                                                                           |
| YIF1A   | 38  | 93  | 10 | 13 | ES+ (2), AP- (1)          | D (8.4), t (7), D (7), t (8.2), T (7), t (8.4), t (4.2), T (6), D (8.4), D (6), T (8.4), T (8.4), t (7)                                                   |
| YIPF1   | 11  | 20  | 0  | 4  | PS-                       | T (8), t (7), T (4.2), t (9), R (8), D (4.2)                                                                                                              |
| YME1L1  | 78  | 78  | 5  | 51 | ES+ (5)                   | B (1)                                                                                                                                                     |
| YWHAZ   | 663 | 524 | 1  | 50 | AP+ (6)                   | S (7.4), R (7.4)                                                                                                                                          |
| YY1AP1  | 16  | 19  | 4  | 16 | ES+ (12.1)                |                                                                                                                                                           |
| ZBTB11  | 14  | 30  | 0  | 15 | ES- (2.2)                 | z (4), z (8), z (9), D (2.3), z (8), z (10), z (7), z (8), z (10), z (4), z (8), z (7), z (10), z (6), z (5), z (10), z (5), z (7), z (9), D (2.3), z (7) |
| ZC3H15  | 49  | 58  | 2  | 13 | AT+ (9.2)                 |                                                                                                                                                           |
| ZC3HAV1 | 14  | 13  | 1  | 7  | AT+ (9.4)                 | t (10), D (10)                                                                                                                                            |
| ZDHHC20 | 51  | 29  | 1  | 18 | ES+ (14)                  | t (1), t (3)                                                                                                                                              |
| ZDHHC4  | 23  | 37  | 1  | 0  | AP- (1.2)                 |                                                                                                                                                           |
| ZDHHC7  | 47  | 75  | 8  | 29 | ES- (4)                   |                                                                                                                                                           |
| ZMIZ1   | 22  | 14  | 3  | 17 | AP- (5)                   |                                                                                                                                                           |
| ZMYM5   | 7   | 15  | 2  | 9  | ES+ (5)                   |                                                                                                                                                           |
| ZNF195  | 8   | 17  | 0  | 9  | ES+ (3)                   |                                                                                                                                                           |
| ZNF207  | 13  | 12  | 4  | 7  | ES- (9)                   |                                                                                                                                                           |
| ZNF217  | 76  | 224 | 6  | 38 | ES+ (6)                   |                                                                                                                                                           |
| ZNF385A | 36  | 161 | 3  | 24 | ES+ (7)                   | R (7), z (7)                                                                                                                                              |
| ZNF398  | 6   | 6   | 1  | 0  | AP+ (1)                   |                                                                                                                                                           |
| ZNF410  | 39  | 23  | 4  | 30 | ES+ (3.2, 3.3), ES+ (3.3) | z (11), z (10), z (9.2)                                                                                                                                   |
| ZNF706  | 15  | 28  | 2  | 0  | AP+ (3.1)                 |                                                                                                                                                           |
| ZNF707  | 8   | 20  | 2  | 0  | ES+ (7.2)                 |                                                                                                                                                           |
| ZNF789  | 7   | 11  | 1  | 8  | ES+ (3)                   |                                                                                                                                                           |

*RPKM (Reads per kilobase per million reads) of control and cisplatin-treated MCF7 cells, their alt splice RPKM (RPKM level of transcripts with an alternate splice form), alt protein RPKM (RPKM level of alternative transcripts with splicing changes in their protein coding regions), and the type and exon location of splice events were indicated. The SpliceSeq software identified 717 events concerning 619 primary transcripts. A: active site; C: Ca<sup>2+</sup> binding; P: nucl. phos. binding; m: metal binding; B: binding site; z: zinc-finger; N: DNA binding; r: cross-link; s: disulfide bond; g: glycosylation; l: lipid binding; i: intramembrane; t: trans membrane; o:coiled-coil; T: topological domain; p: signal peptide; M: short sequence motif; D: domain; S: site; R: region of interest; n: non-standard AA; ES: exon skip; AT: alternative terminator; AP: alternative promoter; PS: premature stop.*
