# Supplementary material for: Role of the splicing factor SRSF4 in cisplatin-induced modifications of pre-mRNA splicing and apoptosis
Source: BMC Cancer. 2015 Apr 7;15:227. doi: 10.1186/s12885-015-1259-0 (PMC4399393; doi:10.1186/s12885-015-1259-0)
Supplement: Additional file 1: — Detailed real-time RT-qPCR procedure, according to the MIQE guidelines. [file 12885_2015_1259_MOESM1_ESM.pdf]

## Additional file 1: Detailed real-time RT-qPCR procedure, according to the MIQE guidelines.

### Experimental design

|                                                                                   |                                                                                                                  |
|-----------------------------------------------------------------------------------|------------------------------------------------------------------------------------------------------------------|
| Definition of experimental and control groups                                     | Cells treated with cisplatin (50 $\mu$ M, 24 hours) or untreated and harvested at the same time                  |
| Number within each group                                                          | 2 or 3                                                                                                           |
| Assay carried out by the core or investigator's laboratory?                       | Investigator's laboratory                                                                                        |
| Acknowledgment of authors' contributions                                          | Most experiments were performed by M. Gabriel. Primers and assay designs were made by M. Gabriel and ChA Lambert |
| Sample description                                                                | MCF7 and Ishikawa cells                                                                                          |
| Volume/mass of sample processed                                                   | 250.000 cells                                                                                                    |
| If frozen, how and how quickly?                                                   | -80°C, directly                                                                                                  |
| If fixed, with what and how quickly?                                              | No fixation                                                                                                      |
| Sample storage conditions and duration (especially for FFPE <sup>2</sup> samples) | Stored for several days at -80°C prior RNA purification                                                          |

### Nucleic acid extraction

|                                                        |                                                                                                                                                                                                                        |
|--------------------------------------------------------|------------------------------------------------------------------------------------------------------------------------------------------------------------------------------------------------------------------------|
| Procedure and/or instrumentation                       | As provided by manufacturer                                                                                                                                                                                            |
| Name of kit and details of any modifications           | High Pure RNA isolation kit (Roche, Mannheim, Germany)                                                                                                                                                                 |
| Source of additional reagents used                     | None                                                                                                                                                                                                                   |
| Details of DNase or RNase treatment                    | DNase, as provided by manufacturer                                                                                                                                                                                     |
| Contamination assessment (DNA or RNA)                  | None. Primers being systematically located on different exons we consider that potential DNA contaminants are unlikely to produce significant amplification. In addition, only one peak was observed on melting curves |
| Nucleic acid quantification                            | Spectrometry                                                                                                                                                                                                           |
| Instrument and method                                  | Nanodrop ND-1000                                                                                                                                                                                                       |
| Purity ( $A_{260}/A_{280}$ )                           | $1.78 < A_{260}/A_{280} < 2.11$                                                                                                                                                                                        |
| Yield                                                  | 19.6 to 240.4 $\mu$ g/nl                                                                                                                                                                                               |
| RNA integrity: method/instrument                       | None                                                                                                                                                                                                                   |
| RIN/RQI or $C_q$ of 3' and 5' transcripts              | None                                                                                                                                                                                                                   |
| Electrophoresis traces                                 | None                                                                                                                                                                                                                   |
| Inhibition testing ( $C_q$ dilutions, spike, or other) | None.                                                                                                                                                                                                                  |

### Reverse transcription

|                                                          |                                                                                                                                                                                          |
|----------------------------------------------------------|------------------------------------------------------------------------------------------------------------------------------------------------------------------------------------------|
| Amount of RNA and reaction volume                        | 1 $\mu$ g RNA in 20 $\mu$ l                                                                                                                                                              |
| Priming oligonucleotide (if using GSP) and concentration | anchored oligo-dT                                                                                                                                                                        |
| Reverse transcriptase and concentration                  | Moloney Murine Leukemia Virus RT, 200 U/ $\mu$ l (as provided by manufacturer)                                                                                                           |
| Temperature and time                                     | 50°C for 1 hour, 85°C for 15min                                                                                                                                                          |
| Manufacturer of reagents and catalogue numbers           | Superscript III Reverse Transcriptase (Invitrogen, #18080-093)                                                                                                                           |
| $C_q$ s with and without reverse transcription           | No "No-Reverse Transcription" control was done. Primers being systematically located on different exons we consider this control less critical than using primers located on same exons. |
| Storage conditions of cDNA                               | - 20°C                                                                                                                                                                                   |

### qPCR target information

|                      |                                                                                                                                                                                      |
|----------------------|--------------------------------------------------------------------------------------------------------------------------------------------------------------------------------------|
| Gene symbol          | GAPDH: NM_001256799.1; B2M: NM_004048.2; MYB: NM_001161660; BRCA1: NM_007294.3; ACTB: NM_004048.2; RB1: NM_00321.2; JAK2 : NM_004972.3 ; FAS : NR_028036.2 ; SERPINB5 : NM_002639.4. |
| Location of amplicon | GAPDH: 407-463; B2M: 349-458; MYB: 1444-1611; BRCA1: 5666-5817; ACTB: 359-422; RB1: 2803-2981; JAK2 : 3756-3907 ; FAS : 413-672 ; SERPINB5 : 741-936.                                |
| Amplicon length      | See additional file 2.                                                                                                                                                               |

|                                                             |                                                                                                                                                                                                                                                                                             |
|-------------------------------------------------------------|---------------------------------------------------------------------------------------------------------------------------------------------------------------------------------------------------------------------------------------------------------------------------------------------|
| Sequence alignment                                          | BLAST                                                                                                                                                                                                                                                                                       |
| Secondary structure analysis of amplicon                    | Not investigated                                                                                                                                                                                                                                                                            |
| Location of each primer by exon or intron (if applicable)   | Primers were systematically chosen on different exons                                                                                                                                                                                                                                       |
| What splice variants are targeted?                          | Primers did not discriminate between the different variants, if any.                                                                                                                                                                                                                        |
| <b>qPCR oligonucleotides</b>                                |                                                                                                                                                                                                                                                                                             |
| Primer sequences                                            | See additional file 2.                                                                                                                                                                                                                                                                      |
| RTPrimerDB identification number                            | NA                                                                                                                                                                                                                                                                                          |
| Probe sequences                                             | No probe used                                                                                                                                                                                                                                                                               |
| Location and identity of any modifications                  | None                                                                                                                                                                                                                                                                                        |
| Manufacturer of oligonucleotides                            | Eurogentec, Seraing, Belgium                                                                                                                                                                                                                                                                |
| Purification method                                         | Desalted                                                                                                                                                                                                                                                                                    |
| qPCR protocol                                               | 50°C for 2min., 95°C for 10min., (95°C for 15sec., 60°C for 1min.) 40X, followed by melting curve (from 60°C to 95°C)                                                                                                                                                                       |
| Reaction volume and amount of cDNA/DNA                      | 25 µl, amount of cDNA corresponding to 5 ng ARN before reverse-transcription                                                                                                                                                                                                                |
| Primer, (probe), Mg <sup>2+</sup> , and dNTP concentrations | Primers: 200nM; Mg2+ and dNTP as provided by manufacturer.                                                                                                                                                                                                                                  |
| Polymerase identity and concentration                       | as provided by manufacturer                                                                                                                                                                                                                                                                 |
| Buffer/kit identity and manufacturer                        | qPCR MasterMix Plus for SYBR-Green (Eurogentec, Seraing, Belgium)                                                                                                                                                                                                                           |
| Exact chemical composition of the buffer                    | As provided by manufacturer                                                                                                                                                                                                                                                                 |
| Additives (SYBR Green I, DMSO, and so forth)                | None                                                                                                                                                                                                                                                                                        |
| Manufacturer of plates/tubes and catalog number             | MicroAmp® Fast 96-well Reaction plate (Applied Biosystems by life technologies)                                                                                                                                                                                                             |
| Reaction setup (manual/robotic)                             | Manual                                                                                                                                                                                                                                                                                      |
| Manufacturer of qPCR instrument                             | StepOnePlus (Applied Biosystems)                                                                                                                                                                                                                                                            |
| <b>qPCR validation</b>                                      |                                                                                                                                                                                                                                                                                             |
| Evidence of optimization (from gradients)                   | None                                                                                                                                                                                                                                                                                        |
| Specificity (gel, sequence, melt, or digest)                | Specificity was ensured by acrylamide gel electrophoresis. Melting curve was systematically performed at the end of each amplification.                                                                                                                                                     |
| For SYBR Green I, C <sub>q</sub> of the NTC                 |                                                                                                                                                                                                                                                                                             |
| Calibration curves with slope and y intercept               | GAPDH: slope=-3.19, y-int=20.0; B2M: slope=-3.47, y-int=23.5; MYB: slope=-3.65, y-int=31.4; BRCA1: slope=-4.21, y-int=31.2; ACTB: slope=-3.65, y-int=21.0; RB1: slope=-3.84, y-int=22.9; JAK2 : slope=-3.37, y-int=28.2; FAS : slope=-5.03, y-int=29.1; SERPINB5 : slope=-3.61, y-int=30.6. |
| PCR efficiency (%) calculated from slope                    | GAPDH: 106; B2M: 94; MYB: 88; BRCA1: 73; ACTB: 87; RB1: 82; JAK2 : 98 ; FAS : 58 ; SERPINB5 : 89                                                                                                                                                                                            |
| CIs for PCR efficiency or SE                                | ND                                                                                                                                                                                                                                                                                          |
| r <sup>2</sup> of calibration curve                         | GAPDH: 1.00; B2M: 0.98; MYB: 1.00; BRCA1: 0.97; ACTB: 1.00; RB1: 1.00; JAK2 : 1.00 ; FAS : 0.97 ; SERPINB5 : 0.94                                                                                                                                                                           |
| Linear dynamic range                                        | From cDNA equivalent to 100 to 0.1ng of RNA before reverse-transcription                                                                                                                                                                                                                    |
| C <sub>q</sub> variation at LOD                             | ND                                                                                                                                                                                                                                                                                          |
| CIs throughout range                                        | ND                                                                                                                                                                                                                                                                                          |
| Evidence for LOD                                            | ND                                                                                                                                                                                                                                                                                          |
| If multiplex, efficiency and LOD of each assay              | No multiplex                                                                                                                                                                                                                                                                                |
| <b>Data analysis</b>                                        |                                                                                                                                                                                                                                                                                             |
| qPCR analysis program (source, version)                     | StepOne software v2.2.2                                                                                                                                                                                                                                                                     |
| Method of C <sub>q</sub> determination                      | Automatic, as provided by manufacturer. We checked that thresholds were crossed during the exponential phase of the amplification reactions.                                                                                                                                                |
| Justification of number and choice of reference genes       | GAPDH, B2M and ACTB were used as calibrators as their expression is not affected by cisplatin treatment as measured by RNASeq analysis.                                                                                                                                                     |
| Description of normalization method                         | Fold change was calculated by the $\Delta\Delta C_q$ (Pfaffl, 2001) using each of the three calibrator genes, and the geometric mean of the fold change                                                                                                                                     |

|                                                                          |                                                                                                                                    |
|--------------------------------------------------------------------------|------------------------------------------------------------------------------------------------------------------------------------|
| Number and concordance of biological replicates                          | was calculated<br>Triplicate samples                                                                                               |
| Number and stage (reverse transcription or qPCR) of technical replicates | No technical replicates for RT step. Technical triplicates for qPCR                                                                |
| Reproducibility (interassay variation, CV)                               | NA. All measurements were done on the same plate for each target gene                                                              |
| Power analysis                                                           | $p < 0.05$                                                                                                                         |
| Statistical methods for results significance                             | T-test was performed on the mean of the triplicate of all samples between MCF7 controls or treated with cisplatin. (1+ Efficiency) |
| Software (source, version)                                               | Excel 2007                                                                                                                         |
